# Organization and engagement of a prefrontal-olfactory network during olfactory selective attention

Hillary L. Cansler<sup>1</sup>, Estelle E. in 't Zandt<sup>1</sup>, Kaitlin S. Carlson<sup>1</sup>, Waseh T. Khan<sup>1</sup>, Minghong Ma<sup>2</sup>, Daniel W. Wesson<sup>1</sup>

<sup>1</sup>Department of Pharmacology and Therapeutics  
Center for Smell and Taste  
Center for Addiction Research and Education  
Norman Fixel Institute for Neurological Diseases  
University of Florida  
1200 Newell Dr.  
Gainesville, FL 32610, USA

<sup>2</sup>Department of Neuroscience, University of Pennsylvania Perelman School of Medicine, Philadelphia, PA 19104, USA

**Contact:**

[hillary.cansler@ufl.edu](mailto:hillary.cansler@ufl.edu)

**Acknowledgements:** This work was supported by National Institutes of Health grants R01DC016519 and R01DC014443 to DW, R01DA049545, R01DA049449, and R01NS117061 to MM and DW, R01DC006213 to MM, and F32DC018232 to HC. We thank Dr. Mark Fuccillo for generously sharing reagents.

**Conflicts of Interest:** The authors have no perceived or real conflicts of interest to declare.

**Key words:** sniffing; olfactory cortex; prefrontal cortex; neural oscillations; active sampling; neural circuits.

1 **Abstract**

2 Sensory perception is profoundly shaped by attention. Attending to an odor strongly  
3 regulates if and how a smell is perceived – yet the brain systems involved in this process  
4 are unknown. Here we report integration of the medial prefrontal cortex (mPFC), a  
5 collection of brain regions integral to attention, with the olfactory system in the context of  
6 selective attention to odors. First, we used tracing methods to establish the tubular  
7 striatum (TuS, also known as the olfactory tubercle) as the primary olfactory region to  
8 receive direct mPFC input in rats. Next, we recorded local field potentials from the  
9 olfactory bulb (OB), mPFC, and TuS while rats completed an olfactory selective attention  
10 task. Gamma power and coupling of gamma oscillations with theta phase were  
11 consistently high as rats flexibly switched their attention to odors. Beta and theta  
12 synchrony between mPFC and olfactory regions were elevated as rats switched their  
13 attention to odors. Finally, we found that sniffing was consistent despite shifting  
14 attentional demands, suggesting that the mPFC-OB theta coherence is independent of  
15 changes in active sampling. Together, these findings begin to define an olfactory attention  
16 network wherein mPFC activity, as well as that within olfactory regions, are coordinated  
17 in manners based upon attentional states.

## 18 **Introduction**

19 Sensory processing and thus perception are both profoundly shaped by our ever-  
20 changing cognitive states. In most cases, the thalamus appears to be a major driver of  
21 state-dependent modulation of sensory information (Wimmer *et al.* 2015; O'Connor *et al.*  
22 2002; Halassa and Kastner 2017; McCormick and Feeseer 1990). For instance, the visual  
23 thalamus modulates primary visual cortex in manners that enhances the signal to noise  
24 of an attended visual cue (McAlonan *et al.* 2008). Similarly, the gustatory thalamus  
25 regulates taste-evoked responsivity of gustatory cortex neurons (Samuelsen *et al.* 2013).  
26 Among all sensory systems, the olfactory system presents a unique challenge for  
27 understanding the influence of cognitive state upon sensory processing. This is because,  
28 while humans (Zelano *et al.* 2005; Spence *et al.* 2000; Plailly *et al.* 2008) and rodents  
29 (Carlson *et al.* 2018) alike can selectively attend to odors, the organization of the olfactory  
30 system lacks obligatory thalamic processing (Gottfried 2010; Courtiol and Wilson 2016;  
31 Kay and Sherman 2006). Thus, other brain systems must engage with olfactory  
32 processing in order to afford one the ability to attend to odors. This is a significant issue  
33 since odors are most often encountered in highly multisensory environments, for instance  
34 during eating, wherein potentially distracting or conflicting cues must be ignored at the  
35 expense of selectively attending to odor.

36 Truly very little is known regarding the neural mechanisms underlying olfactory  
37 attention. One brain region that seems likely to confer this ability, at least in part, is the  
38 tubular striatum (TuS, also known as the olfactory tubercle (Wesson 2020)). This is true  
39 in both humans and rodents. For instance, early work using fMRI uncovered the first  
40 evidence that the human TuS is more activated in response to attended versus

41 unattended odors while human subjects engaged in an olfactory selective attention task  
42 (Zelano *et al.* 2005). Importantly, attention-dependent amplification of odor-evoked  
43 activity in the TuS exceeded that of even the primary “piriform” olfactory cortex (PCX)  
44 (Zelano *et al.* 2005). Our group subsequently found that odor-evoked signal to noise  
45 among TuS neurons was enhanced as rats engaged in olfactory selective attention.  
46 (Carlson *et al.* 2018). While the TuS is engaged by attention in manners which may  
47 subserve the ability to attend to odors, the way that the TuS integrates into a wider brain  
48 network in the context of odor-directed attention is unknown. This includes major voids in  
49 our understanding of descending inputs from brain regions known to be integral for  
50 attention, and how TuS activity is structured relative to that of these regions.

51         The rodent prefrontal cortex (PFC), depending upon how one chooses to define it  
52 (Laubach *et al.* 2018; Le Merre *et al.* 2021), comprises several key subregions including  
53 but not limited to the medial PFC (mPFC) and the orbitofrontal cortex (OFC), each of  
54 which can be divided into more specific subregions. The medial prefrontal cortex (mPFC)  
55 is crucial for many executive processes including attention (Wimmer *et al.* 2015; Birrell  
56 and Brown 2000; Kim *et al.* 2016; Miller and Cohen 2001) and is highly interconnected  
57 with the rest of the brain (Le Merre *et al.* 2021), with particularly dense inputs to sensory  
58 and thalamic areas. mPFC neurons are modulated as animals attentively await a stimulus  
59 (Rodgers and DeWeese 2014; Kim *et al.* 2016), and disruptions to the mPFC impair  
60 attentional set-shifting (Birrell and Brown 2000; Ragozzino *et al.* 2003), sustained  
61 attention (Kim *et al.* 2016), and selective attention (Wimmer *et al.* 2015). mPFC  
62 subdivisions include the prelimbic (PrL) and infralimbic (IL) cortices, which seem to  
63 possess dissociable behavioral functions (Hardung *et al.* 2017; Marquis *et al.* 2007; de

64 Kloet *et al.* 2021; Luchicchi *et al.* 2016). Specifically, the PrL appears important for set-  
65 shifting and selective attention (Marquis *et al.* 2007; Schmitt *et al.* 2017; Kim *et al.* 2016;  
66 Rodgers and DeWeese 2014), while the IL is implicated in behavioral flexibility and  
67 extinction (Barker *et al.* 2014). Therefore, the mPFC, especially the PrL and IL, are  
68 putative candidates for influencing olfactory processing via top-down modulation during  
69 attentional states.

70         Local field potential (LFP) oscillations in the gamma band (40-100 Hz) in sensory  
71 and prefrontal cortices have been associated with attention (Fries *et al.* 2001; Vinck *et al.*  
72 2013; Borgers *et al.* 2005; Brassai *et al.* 2015; Schroeder and Lakatos 2009a). In the  
73 olfactory system, increased power of gamma oscillations in the olfactory bulb (OB) is  
74 observed during successful discriminations between perceptually demanding odor pairs  
75 (Beshel *et al.* 2007), and learning (Losacco *et al.* 2020a), suggesting that they in some  
76 manner aid in cognitively demanding processes. In addition to high frequency oscillations,  
77 theta oscillations (2-12Hz) are profoundly shaped by respiration, including fast  
78 investigatory sniffing, in olfactory regions and beyond (Adrian 1942; Macrides *et al.* 1982;  
79 Vanderwolf 1992; Tort *et al.* 2018b; Colgin 2013; Zhang *et al.* 2021; Fontanini and Bower  
80 2006; Kay and Laurent 1999; Buonviso *et al.* 2003; Miura *et al.* 2012). Interestingly, theta-  
81 band coherence is elevated between the OB and mPFC in emotionally-salient contexts  
82 (Moberly *et al.* 2018; Bagur *et al.* 2021; Zhong *et al.* 2017), indicating functional  
83 connectivity between these networks that can be influenced by behavioral state.  
84 Examining neural oscillations within individual structures, and their synchrony between  
85 structures, can yield valuable insights into the ways that brain regions form functional  
86 networks (Buzsaki 2006; Fries 2015). Whether the mPFC and olfactory system networks

87 (either independently or together) are engaged by selective attention to odors has not  
88 been explored.

89 Here, we sought to investigate the anatomical and functional integration of the  
90 mPFC with olfactory regions (including the OB and TuS) in the context of selective  
91 attention to odors. First, we used cell-type-specific tracing methods to reveal that  
92 excitatory mPFC neurons preferentially target the TuS compared with other olfactory  
93 regions. Next, we used multi-site LFP recordings to demonstrate that the OB, mPFC, and  
94 TuS modify their activity in intra- and inter-areal manners during a behavioral task that  
95 requires selective attention to odors and intermodal attentional switches. Interestingly,  
96 through measuring sniffing as rats engaged in selective attention, we observed that rats  
97 covertly display odor-directed attention, maintaining highly stereotyped sniffing structured  
98 to the task despite shifting attentional demands. Together this work adds to our  
99 understanding of the organization and activities of brain systems which are engaged  
100 during olfactory attention.

101

## 102 **Results**

103 *The PrL and IL preferentially target the TuS compared to other major olfactory structures.*

104 The rodent PFC projects throughout the brain with notably strong and well characterized  
105 inputs to the ventral striatum and thalamus (Vertes 2004; Le Merre *et al.* 2021). Yet the  
106 connectivity of the PFC with primary (OB) and secondary olfactory structures (the anterior  
107 olfactory nucleus (AON), PCX, and TuS) is not well defined. To address this, we injected  
108 Cre-dependent anterogradely transported AAVs encoding synaptophysin tagged with  
109 either GFP or mRuby into the PrL or IL, in combination with an AAV encoding Cre under

110 control of the CaMKII promotor (**Fig. 1A-B**) (Herman *et al.* 2016). This approach allowed  
111 us to observe fluorescent puncta (which can more confidently be attributed to synaptic  
112 terminals, rather than fibers of passage) in olfactory regions receiving input from either  
113 the PrL or IL cortex. Importantly, because Cre expression was driven by the CaMKII  
114 promotor, we can specifically assess excitatory projections which make up >80% of  
115 mPFC neurons (Erö *et al.* 2018) and are major regulators of the PFC's effects (de Kloet  
116 *et al.* 2021). We quantified puncta in three structures recipient of dense olfactory bulb  
117 input: the AON, PCX and TuS (**Fig. 1B-G**). We also inspected the OB for puncta, but did  
118 not quantify this since none were detectable (**Fig. 1F**). Other than the OB, we observed  
119 fluorescent puncta in all regions examined, with a striking density in the TuS. Specifically,  
120 the medial division of the TuS (mTuS), which some have indicated plays a particularly  
121 prominent role in olfaction and motivated behaviors (Ikemoto 2003; Murata *et al.* 2015;  
122 Zhang *et al.* 2017), receives the most input from the mPFC, even more so than all other  
123 regions combined (**Fig. 1G**). Within the mTuS, we observed synapses throughout all 3  
124 layers, with significantly more in layers 2 and 3 (**Fig. 1H**). Importantly, this is where the  
125 vast majority of medium spiny neurons, the principal neuron of the TuS, reside. Further,  
126 we found that the IL projections to the mTuS are denser than those of the PrL (**Fig. 1G-**  
127 **H**). Notably, in 2 separate rats we unilaterally injected a retrograde AAV encoding GFP  
128 into the PrL and IL and observed no GFP+ cells in the TuS (or anterior PCX), indicating  
129 that there is no direct reciprocal feedback from the TuS (or anterior PCX) to the PrL  
130 or IL (**Fig. S1**). Together, these findings indicate that the PrL and IL project to multiple  
131 olfactory regions, with the mTuS being the primary recipient of this input.

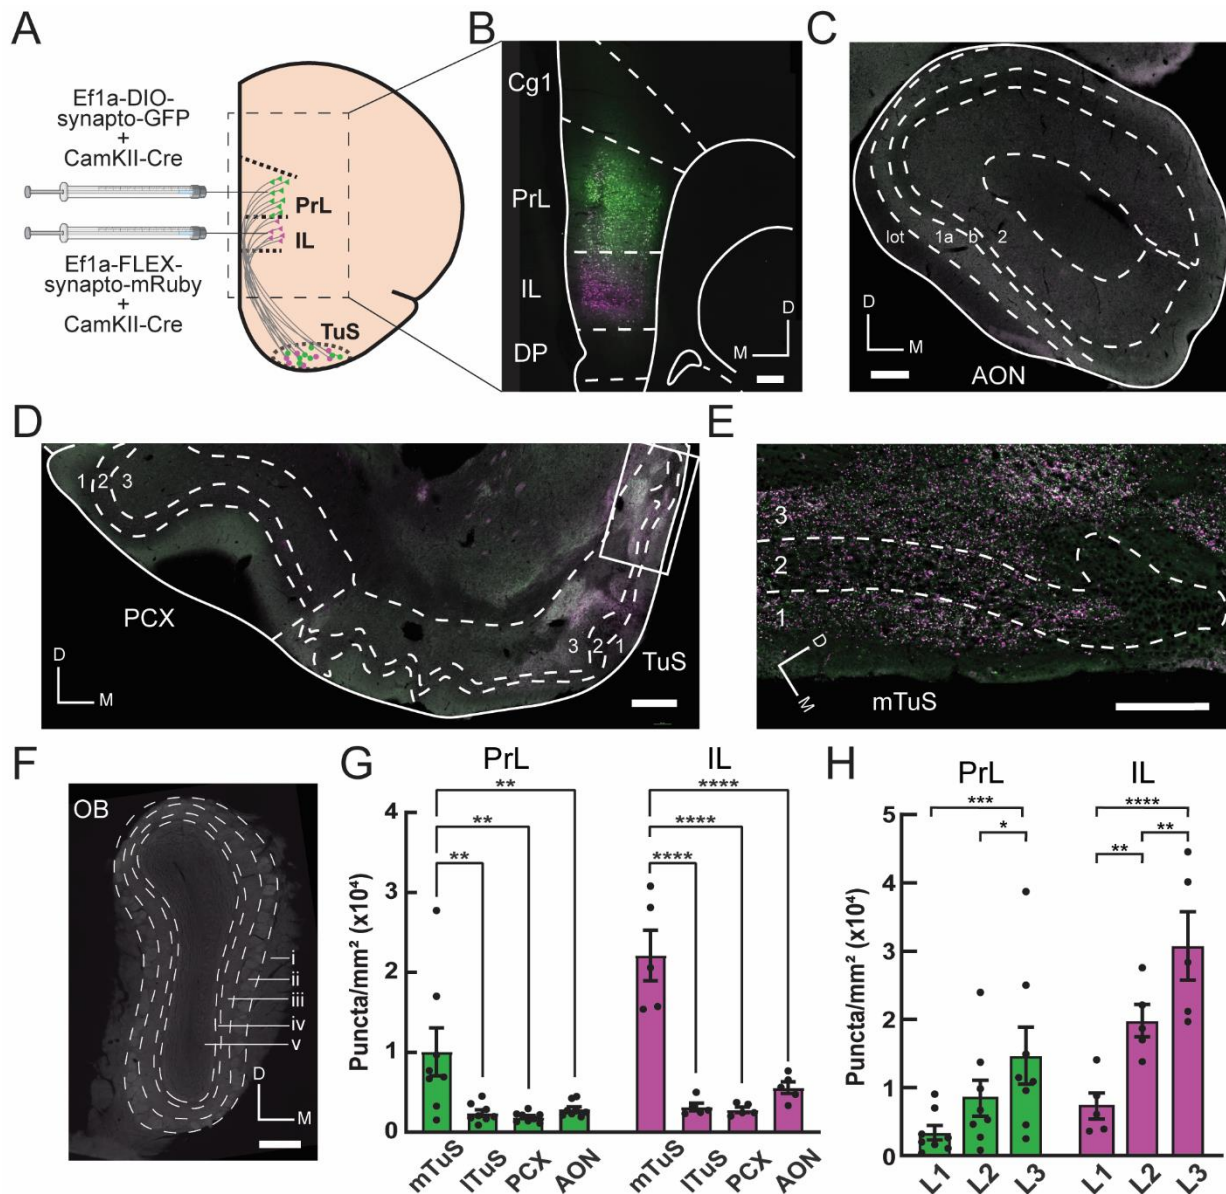

132  
 133  
 134 **Figure 1. The prelimbic and infralimbic medial prefrontal cortex preferentially target the**  
 135 **tubular striatum compared to other major olfactory structures. A.** The PrL and IL cortices  
 136 were selectively targeted with 50/50 mixtures of Ef1a-DIO-synaptophysin-GFP/pENN-AAV9-  
 137 CamKII-Cre-SV40 and Ef1a-FLEX-synaptophysin-mRuby/pENN-AAV9-CamKII-Cre-SV40,  
 138 respectively. **B.** Representative mPFC image showing region-specific viral transduction within the  
 139 same rat. Scale bar 250  $\mu$ m. **C.** Representative image of the AON, showing few fluorescent  
 140 puncta. Cell layers 1-2 and the lateral olfactory tract (lot) are indicated. Scale bar 250  $\mu$ m. **D.**  
 141 Representative image of the PCX and TuS. Note high fluorescence in the medial TuS and low  
 142 fluorescence in the lateral TuS and PCX. Boxed region is shown in panel E. Scale bar 250  $\mu$ m.  
 143 **E.** Magnified view of boxed region shown in panel D, showing high levels of fluorescent puncta,  
 144 indicating synaptic terminals from TuS-projecting mPFC neurons. This image has been  
 145 digitally deconvolved to enhance clarity, for illustration purposes only. Scale bar 100  $\mu$ m. **F.**  
 146 Representative image of the OB absent of fluorescent puncta. Dashed lines indicate layers: i.  
 147 olfactory nerve layer; ii. glomerular layer; iii. external plexiform layer; iv. mitral cell layer;  
 148 granule cell layer. Scale bar 250  $\mu$ m. **G.** Quantification of fluorescent puncta across olfactory regions,



148 normalized by area of quantified region. PrL:one-way ANOVA, main effect of regions,  
149  $F(3,21)=7.82$ ,  $p=0.001$ . IL:one-way ANOVA, main effect of regions,  $F(3,12)=37.08$ ,  $p<0.0001$ .  
150 Asterisks indicate results from Tukey's multiple comparisons test,  $**p<0.01$ ,  $****p<0.0001$ . PrL  
151 mTuS vs. IL mTuS, unpaired t-test,  $p=0.02$ . **H.** Quantification of fluorescent puncta across layers  
152 in the mTuS. PrL: one-way ANOVA, main effect of layers,  $F(2,14)=12.62$ ,  $p=0.0007$ . IL: one-way  
153 ANOVA, main effect of layers,  $F(2,8)=43.04$ ,  $p<0.0001$ . Asterisks indicate results from Tukey's  
154 multiple comparisons test,  $*p<0.05$ ,  $**p<0.01$ ,  $***p<0.001$ ,  $****p<0.0001$ . PrL, prelimbic cortex; IL,  
155 infralimbic cortex; Cg1, cingulate area 1; DP, dorsal peduncular cortex; mTuS/ITuS, medial/lateral  
156 tubular striatum; PCX, piriform cortex; AON, anterior olfactory nucleus; OB, olfactory bulb; D,  
157 dorsal; M medial; L1-L3, layer 1-3. PrL injection,  $n=8$  rats; IL injection,  $n=5$  rats. All error bars  
158 represent SEM.  
159

160 *Among PFC subregions, layer 5 PrL and IL neurons provide the densest input to the TuS.*  
161 While the PrL and IL are strongly implicated in attention, the PFC also includes the OFC.  
162 The OFC is involved in polysensory processing (Rolls 2004; de Araujo *et al.* 2003; Small  
163 *et al.* 2001), and cognition and decision-making (for review see (Izquierdo 2017;  
164 Schoenbaum *et al.* 2009)), making it another strong candidate circuit to instruct state-  
165 dependent odor processing. To directly compare the OFC→TuS and mPFC→TuS  
166 pathways, we unilaterally injected a retrograde AAV encoding GFP into the TuS, and  
167 quantified cell bodies throughout the PFC, including the PrL, IL, medial (MO), ventral  
168 (VO), lateral (LO) and dorsolateral (DLO) OFC subdivisions (**Fig. 2A-D**). We found the  
169 greatest numbers of cells in the IL, PrL, and MO, which together make up the  
170 ventromedial PFC (vmPFC) by virtue of their similar connectivity patterns (Le Merre *et al.*  
171 2021). We observed significantly more cells in the IL than all other regions quantified  
172 except the PrL, and significantly more cells in the PrL than all other areas regions  
173 quantified except the IL and the MO (**Fig. 2D**). Thus, the PrL and IL provide the densest  
174 inputs to the TuS and are well-positioned to influence odor processing.

175 Within the PrL and IL, we quantified cell body locations throughout the cortical  
176 layers for both the ipsilateral and contralateral hemispheres. We observed that in both of

177 these regions, the majority of cell bodies were found in layer 5 (**Fig. 2E**), which is  
178 consistent with other glutamatergic (de Kloet *et al.* 2021) corticostriatal mPFC projections  
179 (Nakayama *et al.* 2018; Ding *et al.* 2001; Gabbott *et al.* 2005). The fact that the TuS  
180 receives its densest PFC inputs from the PrL and IL cortices, together with the fact that  
181 these regions preferentially target the TuS over other olfactory regions, indicates that the  
182 mPFC→TuS pathway is likely the primary route whereby the olfactory system might  
183 receive information regarding states or tasks requiring high executive function, including  
184 attention.

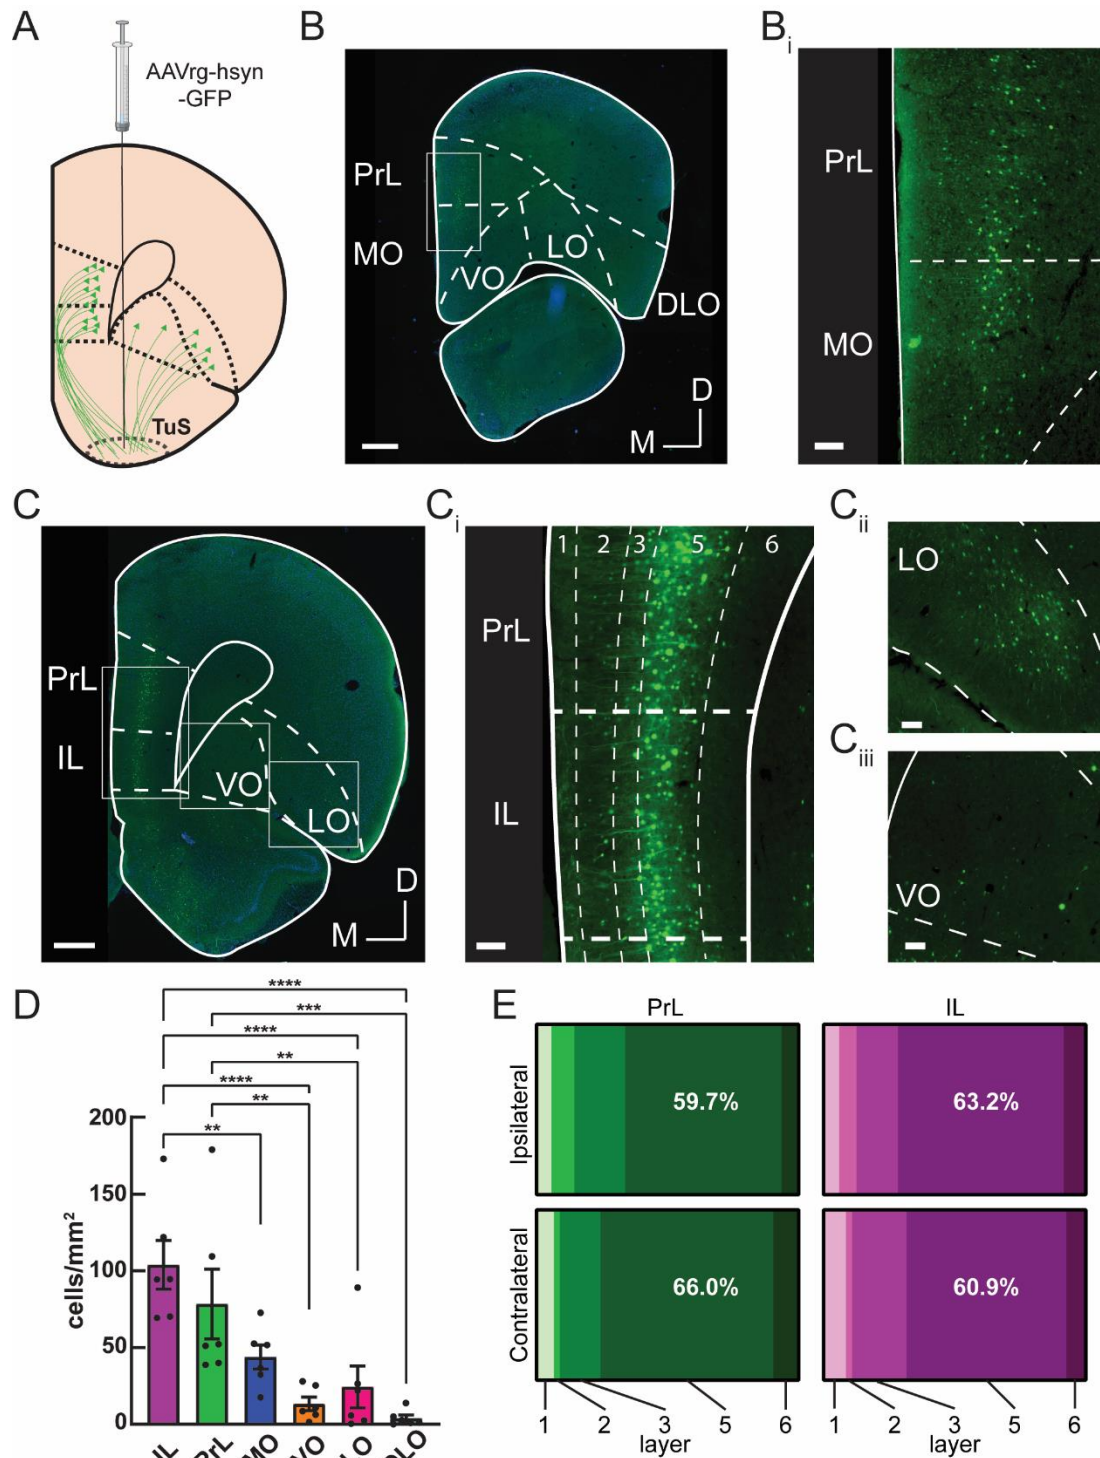

185  
186 **Figure 2. Among prefrontal cortex subregions, layer 5 prelimbic and infralimbic neurons**  
187 **provide the densest input to the tubular striatum.** **A.** The TuS was injected with AAVrg-hsyn-  
188 **GFP** to identify TuS-projecting neurons throughout the prefrontal cortex. **B.** Representative mPFC  
189 **image** at Bregma +4.2mm, showing GFP-labeled TuS-projecting neurons. Boxed region is  
190 **indicated** in panel B<sub>i</sub>. Scale bar 500  $\mu$ m. **B<sub>i</sub>.** Magnified view of the boxed region in panel B<sub>i</sub>. Scale  
191 **bar** 100  $\mu$ m. **C.** Representative PFC image at Bregma +3.2 mm, showing GFP-labeled TuS-  
192 **projecting** neurons. Scale bar 500  $\mu$ m. **C<sub>i</sub>.** Magnified view of boxed region in panel C showing the

193 PrL and IL cortices. Dotted lines indicate layers. Scale bar 100  $\mu\text{m}$ . **Cii.** Magnified view boxed  
194 region showing LO cortex. Scale bar 100  $\mu\text{m}$ . **Ciii.** Magnified view of boxed region showing VO  
195 cortex. Scale bar 100  $\mu\text{m}$ . n=6 rats. **D.** Quantification of cell numbers across prefrontal cortex  
196 regions ipsilateral to the injection site. One-way ANOVA, main effect of regions,  $F(5, 25)=15.67$ ,  
197  $p<0.0001$ . Asterisks indicate results of Tukey's multiple comparisons test,  $**p<0.01$ ,  $***p<0.001$ ,  
198  $****p<0.0001$ . Error bars represent SEM. **E.** Distribution of cell bodies across PrL and IL layers,  
199 in both the contralateral and ipsilateral hemispheres, showing the majority of cell bodies are found  
200 in layer 5. PrL: Two-way ANOVA, main effect of layer  $F(1.15, 5.76)=11.48$ ,  $p=0.014$ . IL: Two-way  
201 ANOVA, main effect of layer  $F(1.32, 6.61)=42.55$ ,  $p=0.0003$ ; main effect of hemisphere  
202  $F(1,5)=34.39$ ,  $p=0.002$ . n=6 rats.  
203

204 *Investigating mPFC and olfactory network activity during odor-directed selective*  
205 *attention.*

206 We next sought to functionally test whether the mPFC and the olfactory system,  
207 specifically the OB and the TuS, integrate into a network during olfactory attention. To  
208 accomplish this, we combined multisite LFP recordings along with the Carlson Attention  
209 Task (CAT) (Carlson *et al.* 2018) to manipulate selective attention to odors (**Fig. 3**).  
210 Briefly, the CAT is a modified two-alternative choice task in which rats are simultaneously  
211 presented with one of two olfactory cues (odor A/odor B) and one of two auditory cues  
212 (tone on/tone off). A single behavioral session begins with tone attention: that is, the tone  
213 cues signal the reward port location whereas the odor cues are distractors (**Fig. 3A-C**,  
214 blue shading). Once criterion on the tone attention phase of the task has been reached  
215 (6 blocks of 20 trials at  $\geq 80\%$  correct), an uncued intermodal rule change occurs, and the  
216 rats must now direct their attention to odors, and ignore tones, to accurately locate their  
217 rewards (**Fig. 3A-C**, orange shading). This rule change is accompanied by a temporary  
218 drop in performance as the rats adjust their behavior to the new rule (**Fig. 3C**, pink  
219 shading) before they eventually perform well on odor attention (6 blocks at  $\geq 80\%$  correct,  
220 orange shading). We will refer to the blocks following the rule change before performance  
221 reaches  $\geq 80\%$  correct on odor attention as “switch” blocks, in which the rat is by-definition

222 performing poorly. Importantly, each session began and ended with 3 blocks of odor-only  
223 trials, in which there were no competing tone cues, to use as a control for odor  
224 discrimination without any additional cognitive demand.

225 In the CAT, there are four possible combinations of trials (**Fig. 3B**). Two of these  
226 are “congruent,” in that the olfactory and auditory cues signal approach to the same  
227 reward port, and two are incongruent, in that the cues signal opposite ports. Thus, the  
228 correct reward port on incongruent trials depends on the current task rule: tone attention  
229 (blue shading) or odor attention (orange shading). Importantly, all analyses of  
230 physiological signals were limited to trials on which the tone was off to avoid multisensory  
231 influences and focus on the effects of cognitive state on odor processing specifically  
232 (Carlson *et al.* 2018). On a single trial of the CAT, the rat will nose poke to initiate a trial,  
233 then must hold in the center port for 1 second before the stimuli come on (**Fig. 3D**, dark  
234 gray shading). Then, the odor and tone stimuli come on simultaneously, and the rat must  
235 remain in the center port for at least 400 ms sampling the stimuli (**Fig. 3D**, light gray  
236 shading). After 400 ms, the rat is free to make a choice at the left or right port and receive  
237 a water reward if correct.

238 We simultaneously recorded LFPs from the TuS, mPFC, and OB from 5 highly-  
239 proficient expert rats (see Methods) while they performed the CAT (**Fig. 3D-E**). This  
240 allowed us to explore network dynamics locally within each structure, as well as coherent  
241 activity between these structures.

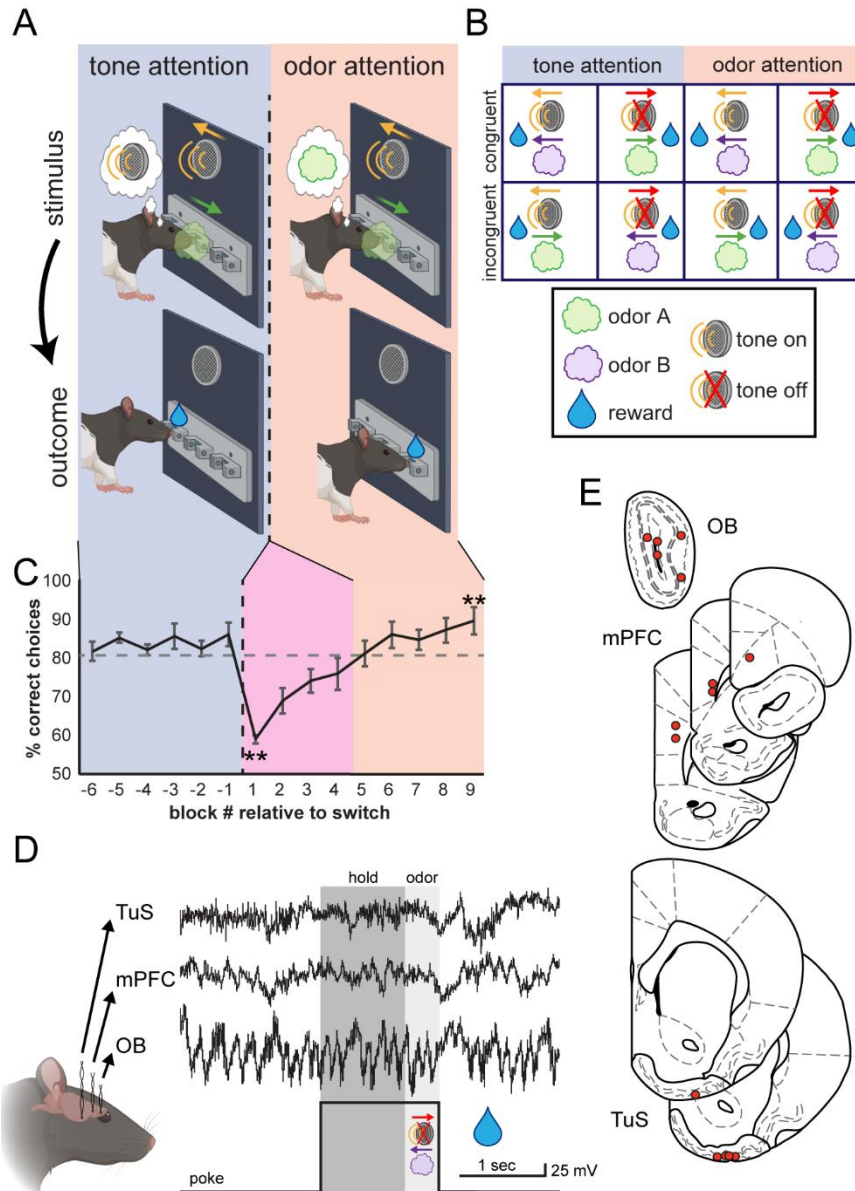

242  
 243 **Figure 3. Investigating medial prefrontal cortex and olfactory network activity during odor-**  
 244 **directed selective attention.** **A.** Freely-moving rats initiate a trial by nose-poking in a center port,  
 245 which triggers simultaneous delivery of one of two auditory cues and one of two odors (stimulus).  
 246 These cues direct the rat to retrieve a fluid reward at either the left or the right port (outcome).  
 247 Behavioral sessions begin with tone attention (auditory cues predict reward; blue shading) and  
 248 switch to odor attention (odors predict reward; orange shading). **B.** All possible trial combinations  
 249 in the Carlson Attention Task. Half of these are congruent (odor and tone indicate same reward  
 250 port) and half are incongruent (odor and tone indicate opposite reward ports). **C.** Behavioral  
 251 performance of all rats across behavioral sessions. After completing 6 blocks of tone attention at  
 252 criterion ( $\geq 80\%$  correct; blue shading), the task was switched to odor attention (orange shading).  
 253 Rats then switched their attention to odors and completed 6 blocks at criterion. Block -1 vs. 1  
 254 paired, two-tailed t-test,  $**p = 0.001$ . Block 1 vs. 9 paired, two-tailed t-test,  $**p = 0.003$ .  $n=5$  rats,  
 255  $4.6 \pm 0.5$  sessions per rat. Error bars represent SEM. **D.** All rats were implanted with bipolar  
 256 recording electrodes in the OB, TuS, and mPFC, and LFPs were acquired during behavior. A  
 257 sample trace is shown from a single trial, in which the rat pokes, holds in the center port for 1

258 second awaiting stimuli (dark gray shading), and remains for 400 ms to sample the stimuli (light  
259 gray shading). **E.** Electrode location summary. Red dots indicate tips of bipolar LFP electrodes.  
260

261 *Elevations in gamma power upon intermodal switching and selective attention to odors.*

262 Gamma oscillations are widely observed throughout the brain, and are tied to a diverse  
263 array of functions including perception, memory, and attention (Fries *et al.* 2001; Buzsáki  
264 and Wang 2012; Mably and Colgin 2018; Kim *et al.* 2016; Siegle *et al.* 2014; Cardin *et al.*  
265 2009). Specifically, elevated gamma power in sensory neocortex is related to attentional  
266 selection (Fries *et al.* 2001). In the OB, elevated gamma is linked to perceptually  
267 demanding discriminations between perceptually similar odors (Beshel *et al.* 2007) and  
268 has historically been conceptualized as integral to behavioral states (Martin and Ravel  
269 2014; Eeckman and Freeman 1990). We examined gamma oscillations in the low (40-60  
270 Hz) and high (60-80 Hz) gamma range within each brain structure as rats completed the  
271 CAT (**Fig 4**). To do this, we measured the power of gamma oscillations within the hold  
272 and odor trial epochs across each task type (odor only, tone attention, switch, and odor  
273 attention), and normalized these values to those for odor only trials to highlight the specific  
274 contributions of sensory-directed attention as compared to 'basic' olfactory discrimination.

275 In the TuS, we observed a slight enhancement in low gamma oscillations with  
276 increased attentional demand, but this did not reach statistical significance across rats  
277 (**Fig. 4B**). Interestingly, we observed that high gamma oscillations in the mPFC were  
278 elevated during odor attention compared to tone attention (**Fig. 4B**). We were surprised  
279 to observe this enhancement specifically for odor-directed attention in the mPFC, since  
280 one might anticipate increased gamma power with increased cognitive demand  
281 regardless of sensory modality. In the OB, we observed increased power of low gamma  
282 oscillations during odor attention as compared to odor only, indicating that increased

283 attentional demand alone is enough to modify odor information at the earliest stage of  
 284 processing in the brain (**Fig. 4B**). Finally, OB oscillations in the high gamma range were  
 285 elevated in power during the attentional switch relative to odor only and tone attention,  
 286 suggesting network activity related to cognitive flexibility. While we did uncover some  
 287 changes in beta band power (**Fig. S2**), these were not as dramatic across attentional  
 288 states as was the case with gamma. Overall, these findings indicate changes in local  
 289 network dynamics in the OB and the mPFC during selective attention to odors, suggesting  
 290 that attention may modulate odor processing at its most early processing stage (the OB).

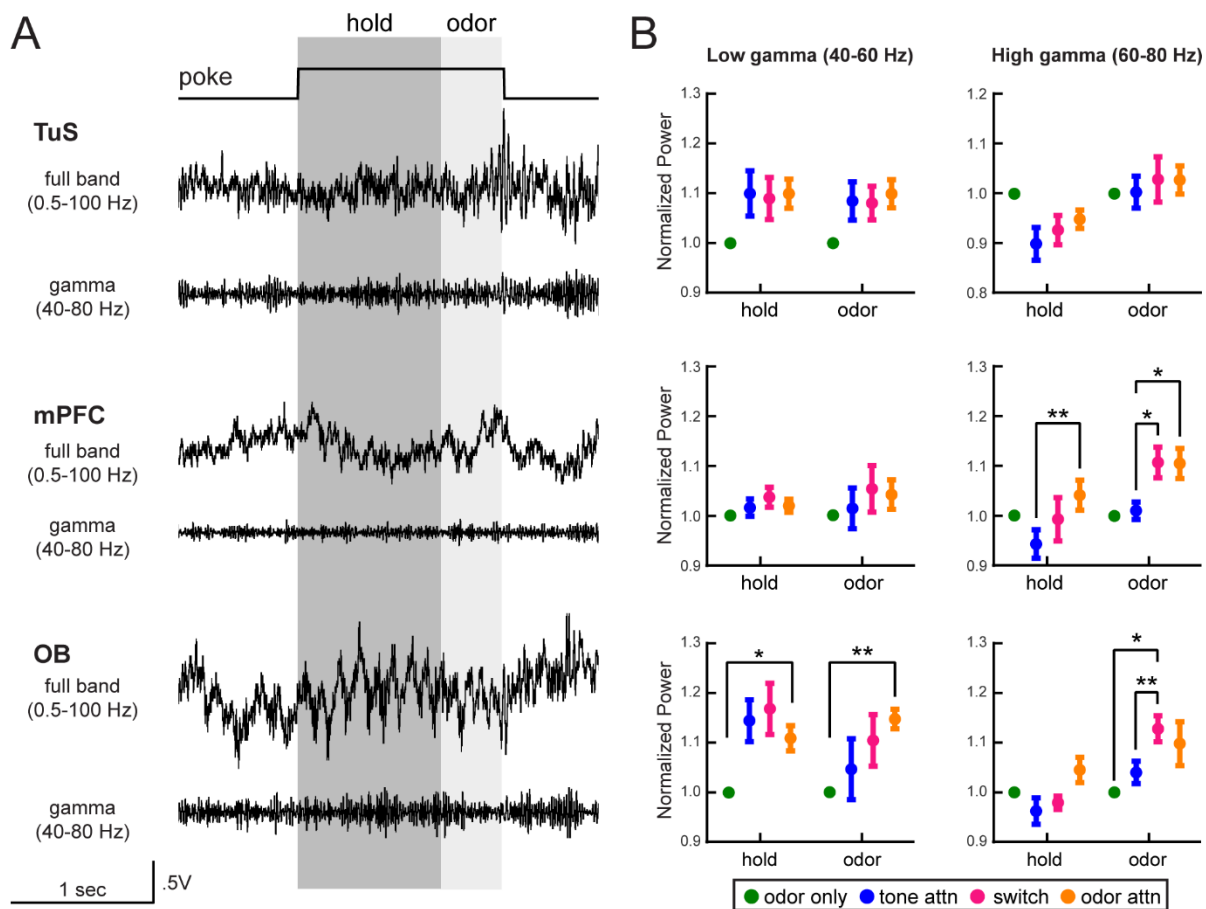

291 **Figure 4. Elevations in gamma power upon intermodal switching and selective attention to**  
 292 **odors.** **A.** Full band and gamma band filtered (40-80 Hz) traces from the TuS (top) the mPFC  
 293 (middle) and the OB (bottom) on a single trial of the Carlson Attention Task. Analysis windows for  
 294 1 sec hold and 400 ms odor periods are indicated in dark and light gray, respectively. **B.**  
 295 Quantification of power in the low and high gamma ranges across all task types, normalized to  
 296 odor only. For each region/frequency band, a 2-way ANOVA with Geisser-Greenhouse correction  
 297



298 was completed. TuS, Low gamma: main effect of task type,  $F(1.62, 6.5)=6.04$ ,  $p=0.037$ . mPFC,  
299 high gamma: Main effect of trial epoch,  $F(1.85, 7.38)=13.66$ ,  $p=0.004$ . Interaction between trial  
300 epoch x task type,  $F(2.36, 9.44)=5.91$ ,  $p=0.019$ . OB, high gamma: Main effect of trial epoch,  
301  $F(1.38, 5.52)=9.47$ ,  $p=0.02$ . Main effect of task type,  $F(2.22, 8.88)=7.60$ ,  $p=0.011$ .  $n=5$  rats, 4.6  
302  $\pm$  0.5 sessions per rat. On all graphs, asterisks indicate results from Tukey's multiple  
303 comparisons \* $p<0.05$ , \*\* $p<0.01$ . All error bars represent SEM.

304

305

306 *Olfactory bulb gamma oscillations couple with theta phase during selective attention.*

307 In some brain regions, the amplitude of high frequency oscillations are structured by the  
308 phase of low frequency oscillations, a phenomenon known as phase amplitude coupling  
309 (PAC) (Tort *et al.* 2010; Bragin *et al.* 1995; Jensen and Colgin 2007; Lakatos *et al.* 2008;  
310 Canolty *et al.* 2006), which is considered a mechanism for attentional selection  
311 (Schroeder and Lakatos 2009b). In the OB, PAC between high gamma and respiratory  
312 theta becomes stabilized as mice become proficient at discriminating between odors  
313 (Losacco *et al.* 2020a), indicating that learning and experience modulates OB PAC. This  
314 plus our finding of elevated high gamma in the OB during odor directed attention led us  
315 to investigate whether the OB network may engage in PAC during olfactory attention.

316 To address this, we first computed comodulograms to identify high frequency  
317 oscillations coupled to theta phase within the rat OB during the CAT, which revealed  
318 strong coupling between theta and high gamma (**Fig 5A**), and much weaker coupling  
319 between theta and beta (**Fig S3**). To investigate the significance of theta-high gamma  
320 PAC, we examined the trial-by-trial amplitude of high gamma power as a function of theta  
321 phase, which indicated high coupling throughout individual sessions and across cognitive  
322 states (**Fig. 5B-C**). Peak phase angle was consistent even comparing correct vs. incorrect  
323 trials (**Fig. 5D**). For each task type, we computed the modulation index (MI) of the PAC,  
324 which is a measure of the extent to which a given high-frequency oscillation is structured  
325 to a low frequency carrier oscillation. MI values can range from 0.005-0.03 from the

326 hippocampus (Tort *et al.* 2010) and OB (Losacco *et al.* 2020b), and we observed a similar  
327 range herein. The distribution in **Fig. 5B** shows the MI theta-high gamma for an example  
328 session, and indicates strong PAC. While some individual rats showed modulation of the  
329 MI with cognitive state, across the population there were no systematic changes in theta-  
330 high gamma PAC with different attentional states (**Fig. 5E**). Because decreased variance  
331 in the peak phase angle in the OB is associated with olfactory learning in a go no-go task  
332 (Losacco *et al.* 2020a), we quantified this as well, but did not observe any differences  
333 across cognitive states (**Fig. 5E**). Thus, while the tightly structured theta-high gamma  
334 PAC in the OB does not change in magnitude across attentional states, its stability  
335 suggests that it possibly supports expert, flexible cognitive function.

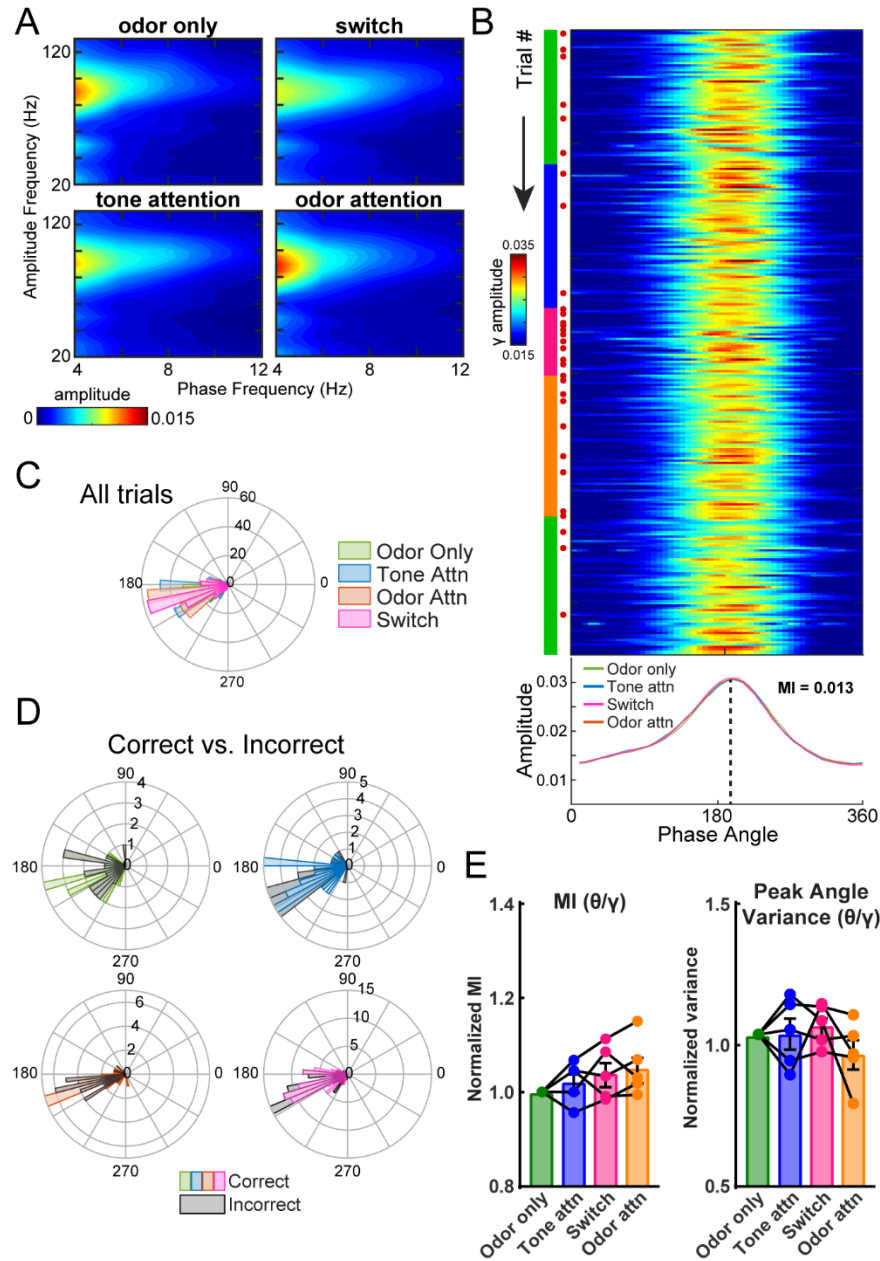

336  
337  
338  
339  
340  
341  
342  
343  
344  
345  
346  
347  
348  
349

**Figure 5. Olfactory bulb gamma oscillations couple with theta phase during selective attention.** **A.** Mean comodulograms across rats showing strong coupling between high gamma and respiratory theta frequencies.  $n=5$  rats,  $4.6 \pm 0.5$  sessions per rat. **B.** Trial by trial theta-gamma for one example session. Green, blue, pink, and orange markings on left side indicate current task type (odor only, tone attention, switch, and odor attention, respectively). Red dots indicate incorrect trials, which expectedly increase in frequency upon switch. The mean amplitude for the session, by task type, is plotted below. MI for the entire session = 0.013. **C.** Polar histogram of peak phase angles by task type for all trials across all sessions for an example rat ( $n=4$  sessions). All task types indicated significant periodicity (Rayleigh test, odor only  $p < 1e-118$ , tone attn  $p < 1e-24$ , switch  $p < 1e-27$ , odor attn  $p < 1e-31$ ), and similar distributions (Kolmogorov-Smirnov tests, all comparisons  $p > 0.05$ ). **D.** Polar histograms of correct and incorrect trials for each task type. For this example rat, incorrect trials were pooled across sessions and compared to a randomly-selected equal number of correct trials. Peak phase angle distributions were statistically

350 similar between correct and incorrect trials. (Kolmogorov-Smirnov tests, all comparisons  $p > 0.05$ ).  
351 **E.** Left, theta-gamma MI across rats, normalized to MI for odor only trials. One-way ANOVA,  
352  $F(2.37, 9.48) = 1.96$ ,  $p = 0.019$ . Right, theta-gamma peak angle variance across rats, normalized  
353 to peak angle variance for odor only trials. One-way ANOVA,  $F(2.03, 8.10) = 1.07$ ,  $p = 0.387$ .  $n = 5$   
354 rats,  $4.6 \pm 0.5$  sessions per rat. Error bars represent SEM.  
355

356 *Beta oscillations are more coherent between the mPFC and olfactory regions during an*  
357 *intermodal attentional shift.*

358 We next tested whether spectral activity between the mPFC and olfactory system might  
359 become more coherent during attention. We observed enhanced coherence in the beta  
360 range (15-35 Hz) between the mPFC and the TuS specifically during the switch blocks –  
361 when the rule has been changed from tone to odor attention, but the rats have not yet  
362 successfully switched their attention (**Fig. 6A**). For the mPFC-TuS, this elevation was  
363 specific to the 1 second hold period prior to odor onset (**Fig. 6B**) which corresponds to  
364 anticipation. Between the mPFC and the OB, we similarly observed increased coherence  
365 in the beta band, but during both the hold and odor epochs (**Fig. 6C-D**). In contrast, no  
366 changes in coherence between the OB and TuS were uncovered (data not shown).  
367 Overall, these data indicate that mPFC engagement with olfactory structures is  
368 upregulated during a cognitively demanding switch from auditory to olfactory selective  
369 attention, suggesting a role for the mPFC in attention-dependent odor processing.

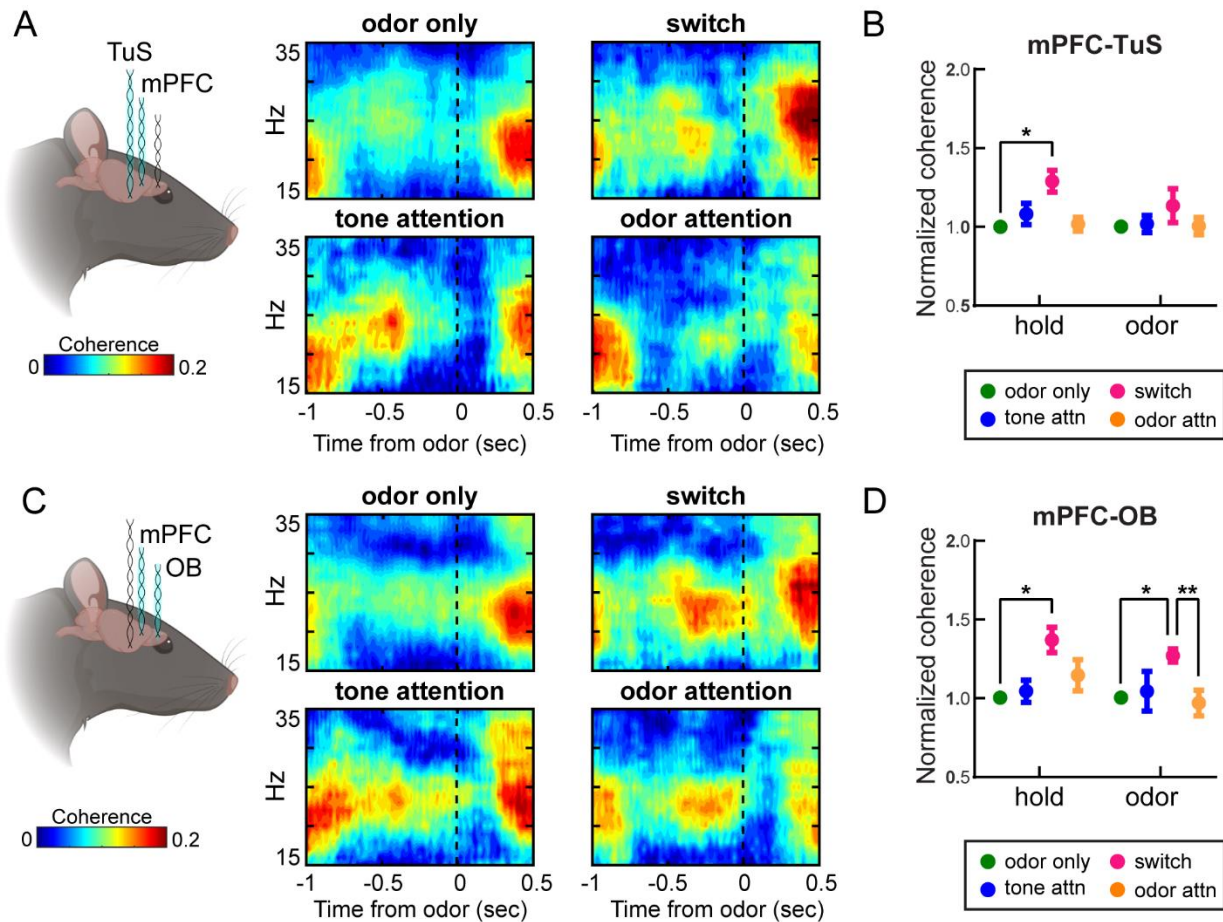

370  
 371 **Figure 6. Beta oscillations are more coherent between the mPFC and olfactory regions**  
 372 **during intramodal attentional shifts.** **A.** Coherogram showing coherence between the mPFC  
 373 and TuS in the beta range (15-35 Hz) for one example rat across task types (n=3 sessions). Nose  
 374 poke begins at -1 sec, dotted line indicates odor onset. **B.** Means for OT-mPFC beta coherence  
 375 across all rats, normalized to odor only. n=5 rats, 4.6 +/- 0.5 sessions per rat. 2-way ANOVA with  
 376 Geisser-Greenhouse Correction, main effect of task type,  $F(1.38, 5.41)=6.54, p=0.041$ . Error bars  
 377 represent SEM. **C.** Coherogram showing coherence between the mPFC and the OB in the beta  
 378 range (15-35 Hz) for one example rat across task types. Nose poke begins at -1 sec, dotted line  
 379 indicates odor onset. **D.** Means for OB-mPFC beta coherence across all rats, normalized to odor  
 380 only. n=5 rats, 4.6 +/- 0.5 sessions per rat. 2-way ANOVA with Geisser-Greenhouse correction,  
 381 main effect of task type,  $F(1.79, 7.15)=13.06, p=0.005$ . Error bars represent SEM.  
 382

383 *OB-mPFC coherence in the respiratory theta range is strongly upregulated during an*  
 384 *intermodal attentional shift to odor attention.*

385 Respiration, including fast investigatory sniffing, may structure theta oscillations in not  
 386 only olfactory regions like the OB (e.g., (Adrian 1942; Kay and Laurent 1999; Buonviso et  
 387 al. 2003)) and TuS (Carlson et al. 2014), but also the PFC (Moberly et al. 2018; Tort et

388 *al.* 2018b; Biskamp *et al.* 2017; Bagur *et al.* 2021; Zhong *et al.* 2017). Slow wave  
389 respiratory theta may serve as a carrier for synchronizing brain regions (Colgin 2013;  
390 Fontanini and Bower 2006). This is particularly relevant in an odor-guided task, where  
391 correct performance depends upon sampling of the odors via sniffing. We observed that  
392 during the attentional switch, there was a striking increase in coherence in the theta range  
393 (2-12 Hz) compared to the odor attention state (**Fig. 7A-B**). While a slight increase was  
394 observed during the hold epoch (**Fig. 7A-B**), this increase was much more pronounced  
395 and statistically significant during the odor sampling period (**Fig. 7A-B**). While our prior  
396 analyses had been restricted solely to correct trials for odor only, tone attention, and odor  
397 attention, we included correct and incorrect trials for all switch blocks, since this switch  
398 state is defined by poor performance and behavioral flexibility, and also because this  
399 allowed for the inclusion of comparable numbers of trials in the analysis (see Methods).  
400 Thus, we separated trials for switch blocks only into correct and incorrect trials, discarding  
401 a random selection of correct trials to match the number of incorrect trials available. This  
402 revealed, counterintuitively, a greater coherence on incorrect compared to correct trials  
403 (**Fig 7C**), suggesting that OB-mPFC theta band coherence is upregulated in contexts  
404 where behavioral flexibility is required.

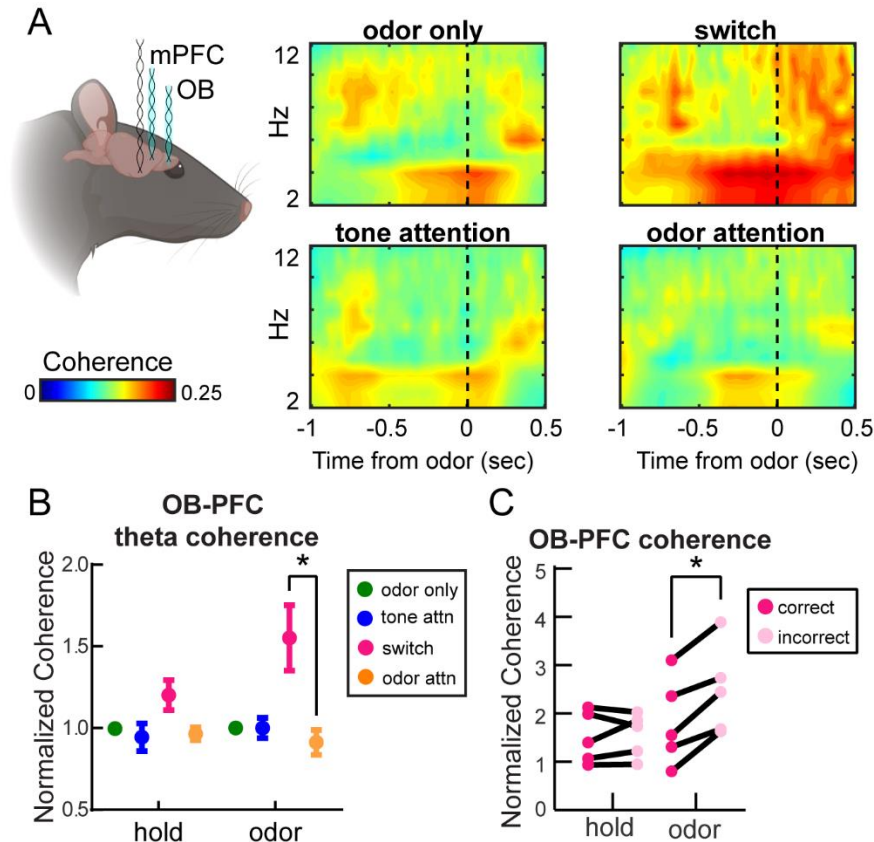

405  
406  
407  
408  
409  
410  
411  
412  
413  
414  
415  
416  
417  
418  
419  
420  
421

**Figure 7. Olfactory bulb and medial prefrontal cortex coherence in the respiratory theta range is strongly upregulated during an intramodal attentional shift to odor attention. A.** Mean coherogram across rats showing coherence in the theta range (2-12 Hz) across task types. **B.** Mean theta coherence across rats for each trial epoch and each task type. Odor only, tone attention, and odor attention trials include only correct trials from criterion performance blocks. Switch quantification includes all trials from blocks below criterion performance. 2-way ANOVA with Geisser-Greenhouse correction, main effect of task type  $F(1.3, 5.2)=7.07, p=0.039$ . Asterisk on graph indicates results from Tukey's multiple comparison's test,  $*p<0.05$ . Error bars represent SEM. **C.** Theta coherence for correct and incorrect trials during the switch. While there were more correct than incorrect trials, randomly selected correct trials were excluded from this analysis to match the number of incorrect trials.  $n=5$  rats,  $4.6 \pm 0.5$  sessions per rat. 2-way ANOVA with Geisser-Greenhouse correction, main effect of outcome  $F(1,4)=76.81, p=0.0009$ . Interaction between outcome and trial epoch  $F(1.56, 6.24)=5.39, p=0.048$ . Asterisk on graph indicates results from Sidak's multiple comparisons test,  $*p<0.05$ .

422 *Rats maintain highly-stereotyped sniffing strategies despite increased attentional*  
423 *demands.*

424 Sniffing behavior in rodents is influenced by many factors including wakefulness, the  
425 stimulus being sampled, and motivational state (Clarke and Trowill 1971; Ikemoto and

426 Panksepp 1994; Wesson *et al.* 2008; Kepecs *et al.* 2007; Rojas-Líbano and Kay 2012;  
427 Lefèvre *et al.* 2016). As discussed above, whether passive (respiration) or active  
428 (sniffing), this behavior subsequently shapes neural activity throughout the brain (Adrian  
429 1942; Macrides *et al.* 1982; Vanderwolf 1992; Colgin 2013; Fontanini and Bower 2006;  
430 Verhagen *et al.* 2007; Buonviso *et al.* 2003; Carey *et al.* 2009; Jordan *et al.* 2018;  
431 Shusterman *et al.* 2011; Sobel and Tank 1993; Spors *et al.* 2006). We reasoned that if  
432 rats adjusted their sniffing when faced with the demand to selectively attend to odors, this  
433 could potentially account for the changes in OB-mPFC theta coherence. No prior work  
434 has assessed sniffing strategies of rodents during olfactory selective attention. To test  
435 this, we trained a separate cohort of rats to perform the CAT before implanting  
436 thermocouples in their nasal cavities, allowing us to monitor sniffing behavior by  
437 measuring temperature changes (airflow) within the nasal cavity (**Fig. 8A-B**). Unlike  
438 humans, who respond to changing attentional demands by modifying both the depth and  
439 timing of respiration (Plailly *et al.* 2008; Arabkheradmand *et al.* 2020), rodents most  
440 dramatically employ changes in sniffing frequency during odor active sampling (Cenier *et*  
441 *al.* 2013; Wesson *et al.* 2009; Kepecs *et al.* 2007). Therefore, we quantified sniffing  
442 frequency specifically during the hold and odor periods. As illustrated by the example  
443 session from one rat in **Fig. 8C**, we observed no clear changes in sniffing behavior across  
444 task types (**Fig. 8C-D**). Instead, the rats displayed a highly stereotyped pattern of sniffing  
445 behavior, suggesting that reaching high proficiency on the CAT results in their  
446 development of a sensorimotor program that is implemented on each trial, regardless of  
447 current attentional demand (**Fig. 8C**, bottom). This was the case across all rats. Although  
448 we observed a slight decrease in sniffing frequency specifically during the hold period



449 throughout a session on average (**Fig. 8D, F**), this was confined to the hold period as the  
450 rats anticipated odor arrival and sniffing frequency during the odor sampling period  
451 remained remarkably constant throughout the sessions for 2/3 rats (**Fig. 8D, F**). Given  
452 the lack of changes in sniffing frequency by task type, we investigated whether the timing  
453 of sniffs during the odor period were more intentional in relation to odor onset when  
454 animals were faced with attending to odor. We examined the time to the first sniff across  
455 task types and found no difference, suggesting that sniff timing relative to odor onset is  
456 independent of attentional demands (**Fig. 8E**). We also examined sniffing frequency on  
457 correct versus incorrect trials during the switch blocks (**Fig. 8G**) yet did not identify  
458 differences in sniffing frequency, providing further evidence that changes in sniffing  
459 behavior do not likely account for modulations in OB-mPFC coherence that we  
460 uncovered, which were correlated with trial outcome. Together, these data indicate that  
461 sniffing strategies in rats are resilient to enhanced attentional demand, providing evidence  
462 for covert (rather than overt) olfactory attention in rodents.

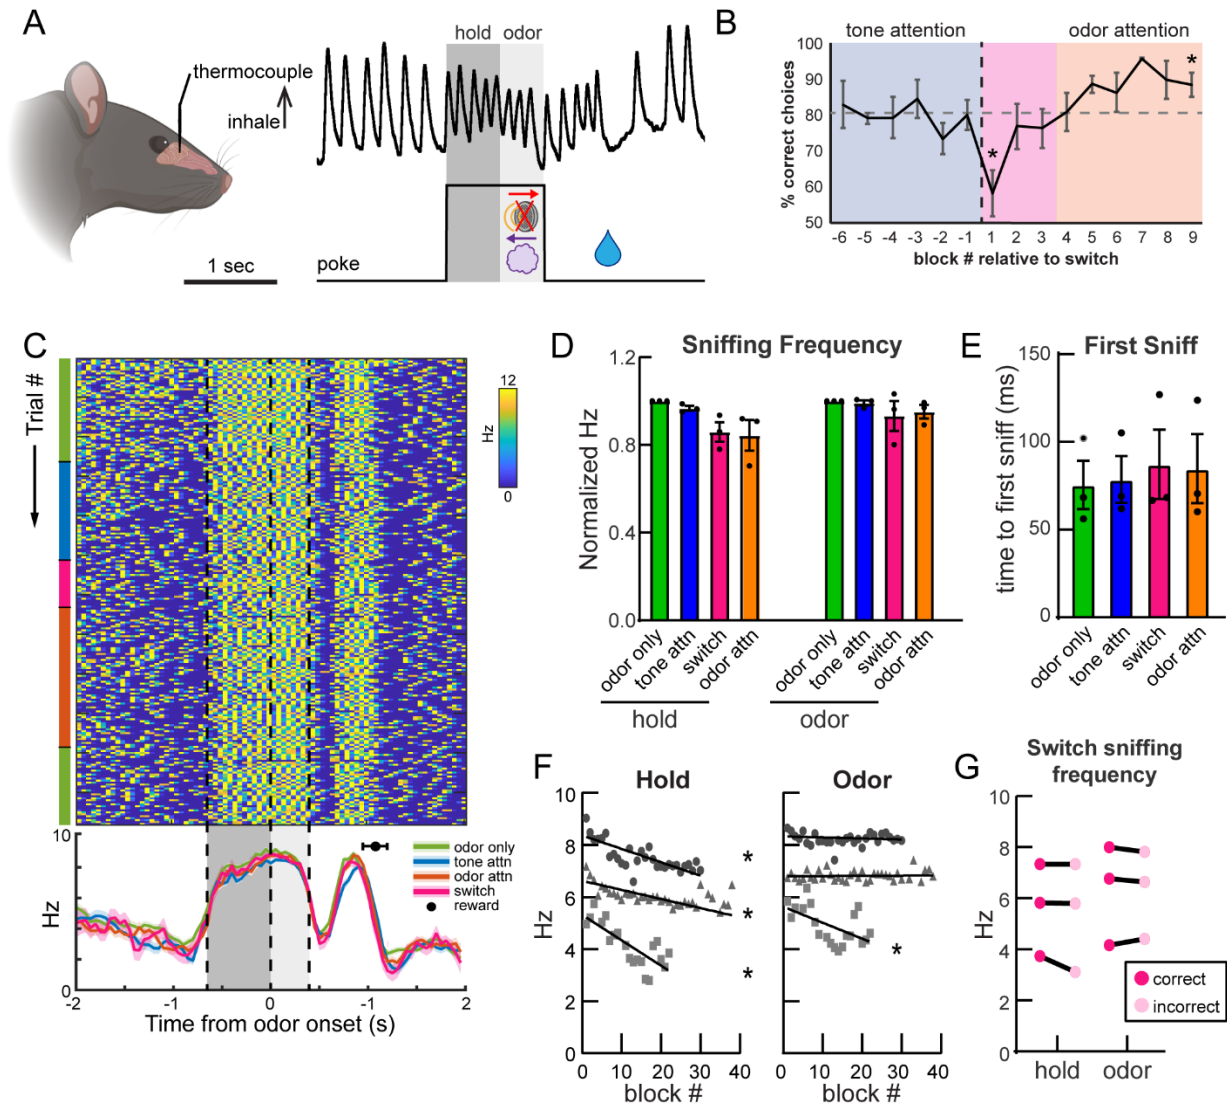

463  
 464 **Figure 8. Rats maintain highly stereotyped sniffing strategies despite increased attentional**  
 465 **demands.** **A.** Sample trace of thermocouple signal from rat nasal cavity on a single trial. 600 ms  
 466 hold and 400 ms odor epochs are indicated by dark and light gray shading, respectively. **B.**  
 467 Behavioral performance. Block -1 vs. 1 paired, two-tailed t-test,  $p = 0.049$ . Block 1 vs. 9 paired,  
 468 two-tailed t-test,  $p = 0.026$ . **C.** Instantaneous sniff frequency for one session, from one example rat  
 469 (rat 137). Colored bars on the left-hand side indicate the current task type. Dotted lines and light  
 470 and dark gray shading represent hold and odor epoch respectively. Mean sniffing frequency  $\pm$   
 471 SEM for each task type is plotted below, with the black circle indicating the mean time of reward  
 472 acquisition ( $\pm$ SEM). **D.** Sniffing frequency means within each trial epoch. 2-way ANOVA with  
 473 Geisser-Greenhouse correction, main effect of trial epoch  $F(1,2) = 29.47$ ,  $p = 0.032$ . No main effect  
 474 of task type,  $F(1.04, 2.09) = 3.2$ ,  $p = 0.21$ . Error bars represent SEM. **E.** Time to the first sniff  
 475 following odor onset. One-way ANOVA with Geisser-Greenhouse correction,  $F(1.19, 2.38) = 1.91$ ,  
 476  $p = 0.29$ . Error bars represent SEM. Similar results were seen when calculating time to second and  
 477 third sniffs, as well as intervals between them (data not shown). **F.** Correlations between block #  
 478 of the session and sniffing frequency. Rat 137 (circles) hold:  $R^2 = 0.33$ ,  $F(1,111) = 54.46$ ,  $p < 0.0001$ ,  
 479 odor:  $R^2 = 0.009$ ,  $F(1,111) = 1.03$ ,  $p = 0.31$ . Rat 138 (squares) hold:  $R^2 = 0.61$ ,  $F(1,18) = 28.61$ ,  
 480  $p < 0.0001$ , odor:  $R^2 = 0.32$ ,  $F(1,18) = 8.406$ ,  $p = 0.009$ . Rat 139 (triangles) hold:  $R^2 = 0.3$ ,  
 481  $F(1,168) = 73.14$ ,  $p < 0.0001$ , odor:  $R^2 = 0.0004$ ,  $F(1,168) = 0.07$ ,  $p = 0.79$ . **G.** Sniffing frequency for

482 correct and incorrect trials in switch blocks only. 2-way ANOVA with Geisser-Greenhouse  
483 correction, main effect of trial epoch,  $F(1,2)=57.65$ ,  $p=0.017$ . No main effect of trial outcome.  $n=3$   
484 rats,  $3.5 \pm 2.5$  sessions per rat.

485

486

## 487 ***Discussion***

488 Here we used anatomical, behavioral, and physiological approaches to demonstrate  
489 integration of the mPFC with the olfactory system in the context of selective attention to  
490 odors. We show that mPFC neurons in the PrL and IL subregions directly and  
491 preferentially target the mTuS compared to other olfactory regions, suggesting that they  
492 are well-positioned to exert influence on olfactory processing via the mTuS. We then used  
493 a physiological and behavioral approach to demonstrate local and interregional effects of  
494 attention on network activity within and between the mPFC and olfactory regions,  
495 including the OB and TuS. Finally, we found that olfactory sampling behavior is resilient  
496 to attentional demand, indicating that olfactory attention may be an “covert” rather than  
497 “overt” process. Together, this work adds to a growing body of literature on the possible  
498 mechanisms underlying cognitive modulation of olfactory processing and thus perception.

499

### 500 *Insights into mPFC connectivity with the olfactory system.*

501 Our tracing experiments uncovered previously unappreciated aspects of mPFC  
502 connectivity with the olfactory system. We found that the PrL and IL most densely  
503 innervate the mTuS compared with other olfactory regions. By using a combinatorial AAV  
504 approach, where Cre expression driven by the CaMKII promoter permits expression of  
505 synaptophysin-eGFP/-mRuby, we were able to identify this pathway as excitatory while  
506 confidently attributing fluorescence in the TuS (and PCX) to synaptic terminals (primarily  
507 in layers 2 and 3) rather than fibers of passage (**Fig. 1**). We further demonstrated that

508 among PFC subregions, the PrL and IL provide the most projections to the TuS, with the  
509 MO coming in third, and these projection neurons mostly reside in layer 5 (**Fig. 2**). Our  
510 data are in agreement with earlier tracing work which established that rat mPFC neurons  
511 project throughout the brain, including in the TuS (Vertes 2004), and a recent review  
512 proposing that the PrL, IL and MO be grouped together as the ventromedial PFC, based  
513 upon their connectivity (Le Merre *et al.* 2021). Our results expand upon previous literature,  
514 which used anterograde phaseolus vulgaris-leucoagglutinin tracing (Vertes 2004), by  
515 contributing (1) specificity and certainty regarding the specific layers of mPFC→TuS  
516 synapses and (2) clarity about at least one mPFC cell type. mPFC glutamatergic neurons  
517 modulate their firing during sustained attention (Kim *et al.* 2016) and encode task rules  
518 during an intermodal attention task (Rikhye *et al.* 2018), suggesting that TuS-projecting  
519 glutamatergic mPFC neurons are positioned to influence olfactory processing during  
520 attentionally-relevant behavioral events. Future work illuminating the more specific  
521 identities of these TuS projecting mPFC neurons (e.g., via transcriptomics) will be  
522 important for disambiguating their specific circuitry and possible contribution to olfactory  
523 attention.

524

525 *Prefrontal-olfactory network engagement during selective attention.*

526 Our multisite LFP recordings during attentional performance uncovered many changes in  
527 network activity which expand our appreciation for how the olfactory system is shaped by  
528 cognitive state. There are several especially notable outcomes we discuss here.

529 First, while we know that the mPFC is crucial for attention, no studies have  
530 monitored mPFC network activity during olfactory attention, leaving a major void in our

531 understanding of how the mPFC engages with the olfactory system. Because the mPFC  
532 is integral for some forms of attention, we predicted it may be recruited during olfactory  
533 attention. In support of this, we observed elevated gamma power in the mPFC during  
534 odor-directed attention relative to tone attention (**Fig. 4**). The mPFC is certainly not an  
535 olfaction-specific structure, though it is engaged by odor-guided tasks requiring learning  
536 (Wang *et al.* 2020) and high working memory capacity (De Falco *et al.* 2019). This  
537 elevation in gamma power does not likely reflect increased reward confidence, as  
538 behavioral performance was comparable across task types (**Fig. 3C**). It is interesting to  
539 consider whether the mPFC of rodents is predisposed to favor and prioritize olfactory  
540 information more so than other sensory stimuli. Nevertheless, these findings exhibit  
541 engagement of the mPFC during odor-directed attention, providing support for its  
542 inclusion in an olfactory attention network.

543

544 *Olfactory attention enhances power of OB gamma oscillations.*

545 Our work is the first to monitor OB activity during selective attention. We found that  
546 attention powerfully shapes OB activity, which implies that odor information received by  
547 structures downstream from the OB, including the TuS, is subject to attention-dependent  
548 modulation. Specifically, we observed increased power of low gamma oscillations (40-60  
549 Hz) in the OB during odor-directed attention as compared to odor only discriminations  
550 (**Fig. 4**). Additionally, we observed elevated power of high gamma oscillations (60-80 Hz)  
551 while rats attempted to switch their attention from tones to odors (**Fig. 4**). While increased  
552 gamma power in the OB has been associated with successful discrimination of  
553 perceptually similar vs. dissimilar odors (Beshel *et al.* 2007), our findings indicate that

554 similar effects can be observed when the odor discrimination is simple/coarse, but the  
555 attentional demand is high. Interestingly, elevated low gamma power during odor  
556 attention was evident during both the hold and odor epochs, while elevated high gamma  
557 power during switch blocks was isolated to the odor sampling period (**Fig. 4B**). High and  
558 low gamma oscillations are considered distinct phenomena in the OB, and are believed  
559 to have mechanistically unique origins (Kay 2003), so it is perhaps not surprising to  
560 observe modulation of these frequency bands during different attentional demands. Low  
561 gamma oscillations are believed to arise from inhibition between local interneurons, are  
562 unstructured relative to the sniff cycle, and are functionally mysterious, though they have  
563 been observed in states of engaged quiescence (Kay 2003). Our data thus support a  
564 potential role for low gamma oscillations in attentionally demanding odor discriminations,  
565 though future work is needed to fully appreciate the mechanisms of this.

566 In contrast, high gamma is structured to the sniff cycle, and is generated by local  
567 excitatory-inhibitory interactions (Schoppa 2006; Neville and Haberly 2003; Halabisky  
568 and Strowbridge 2003; Lepousez and Lledo 2013). Disruption of high gamma oscillations  
569 in the OB impairs odor discrimination, suggesting their importance for basic aspects of  
570 odor perception (Lepousez and Lledo 2013). While the mechanisms by which they may  
571 be modulated are unclear, one compelling proposition is that neuromodulators, including  
572 acetylcholine and noradrenaline, influence excitatory-inhibitory interactions in the OB  
573 (Kay *et al.* 2009). This is of particular interest given the role of these neuromodulators in  
574 states of attention and arousal (Sara 2009; Yu and Dayan 2005). Our observation that  
575 high gamma power elevations during the switch are confined to the odor sampling period  
576 is consistent with these mechanistic underpinnings and suggests specific changes in the

577 nature of odor processing as one undergoes a cognitively demanding switch to odor  
578 attention.

579 As mentioned, high frequency gamma in the OB is consistently aligned with the  
580 respiratory cycle, which was evident in our PAC analysis (**Fig. 5**). Recent work  
581 demonstrated that OB theta-high gamma PAC is strengthened as mice learn to  
582 discriminate odors in a go-no go task, specifically for the go stimulus, suggesting that  
583 PAC may support olfactory behavior (Losacco *et al.* 2020a) and leading us to test whether  
584 attention employs (or perhaps just simply influences) OB PAC. Our results uncovered  
585 highly consistent theta-gamma PAC in the OB across attentional demands, and much  
586 weaker coupling between theta and beta oscillations, leading us to focus on theta-gamma  
587 PAC. However, we did not observe a decrease in PAC when expert rats completed trials  
588 incorrectly (**Fig. 5D**), suggesting that perhaps PAC is not necessary to successfully  
589 discriminate coarse odor pairs, like the ones we used herein. One possible explanation  
590 for this difference is that in 2-alternative choice tasks, like the CAT, both stimuli are  
591 assigned positive valence, while in go no-go tasks like that used by (Losacco *et al.*  
592 2020a), one stimulus loses positive valence upon learning. Throughout a single session  
593 of the CAT, odors temporarily lose their reward-predictive value during tone attention, but  
594 it is quickly regained (e.g., **Fig. 3C**). Our data indicate that OB PAC, in rats who have  
595 been shaped to expert level on the same odor discrimination over many weeks, is resilient  
596 to a temporary lapse in positive odor valence, and perhaps supports flexible behavior  
597 supporting attentional switches.

598

599

600 *Beta synchrony integrates mPFC activity within the olfactory network.*

601 Our data are the first to show functional coupling between the mPFC and olfactory regions  
602 during attentional demands – specifically during an intermodal attentional shift to odors  
603 **(Fig. 6)**. Beta oscillations are considered an important mechanism by which long-range  
604 communication can occur between brain regions (Spitzer and Haegens 2017; Kopell *et*  
605 *al.* 2000), and further, are implicated in top-down control of attention (Richter *et al.* 2017;  
606 Sacchet *et al.* 2015). We observed elevated beta coherence between the mPFC and the  
607 TuS as rats attempted to switch their attention from tones to odors **(Fig. 6A-B)**. In the  
608 context of our finding that the mPFC and the TuS are connected via a unidirectional  
609 monosynaptic pathway **(Figs. 1-2)**, these data suggest that communication between the  
610 mPFC and TuS is strengthened during attentional shifts. Indeed, ventral striatum-  
611 projecting mPFC neurons are implicated in cognitive flexibility by integrating feedback  
612 from trial outcomes (Spellman *et al.* 2021), suggesting that the mPFC→TuS pathway  
613 could engage in the same processes. Our findings provide further support for the  
614 hypothesis that interareal beta oscillations may be a mechanism by which information  
615 about behavioral context is conveyed from higher-level cortex to lower-level sensory  
616 areas (Bressler and Richter 2015; Wang 2010; Kay and Freeman 1998), and are the first  
617 to demonstrate that this concept is applicable to the olfactory system, which possesses  
618 unique anatomical organization.

619 In addition to enhanced mPFC-TuS coherence, we also observed enhanced beta  
620 band coherence between the mPFC and the OB **(Fig. 6C-D)**, raising the intriguing  
621 possibility that prefrontal influence on olfactory processing could begin as early as the  
622 OB. While the OB and mPFC are not connected monosynaptically **(Fig 1)**, they are



623 intermediately connected via bidirectional connectivity with the AON, a pathway known to  
624 drive coherence between these structures (Moberly *et al.* 2018). Additionally, these two  
625 regions both receive inputs from key neuromodulatory nuclei (Santana and Artigas 2017;  
626 Devore and Linster 2012; McLean *et al.* 1989; Rothermel *et al.* 2014; Passetti *et al.* 2000;  
627 Devoto *et al.* 2005; Zaborszky *et al.* 1986), which may influence the power of beta  
628 oscillations in the OB, perhaps by modifying granule cell excitability (Osinski *et al.* 2018).  
629 This raises the possibility that neuromodulators may enable mPFC-OB coherence via  
630 simultaneous phasic input to both the mPFC and OB. Cholinergic input increases  
631 (Passetti *et al.* 2000; Himmelheber *et al.* 2000) and modulates mPFC firing in the context  
632 of attention (Gill *et al.* 2000), and powerfully alters the encoding of odors in the OB  
633 (Chaudhury *et al.* 2009; Devore and Linster 2012; Ogg *et al.* 2018; D'Souza and  
634 Vijayaraghavan 2014). Indeed, lesioning of cholinergic nuclei results in reduced beta  
635 synchrony and increased attentional errors in rats (Ljubojevic *et al.* 2018), indicating at  
636 role for cholinergic modulation in attention-related interregional synchrony. Whether  
637 cholinergic mechanisms contribute to attention-driven beta synchrony between the mPFC  
638 and OB as we observed is an important future question.

639

640 *Olfactory sampling is resilient to attentional demand.*

641 Odor perception requires the inhalation of an odor, and in rodents this occurs by  
642 means of rhythmic inhalation and exhalation of air through the nose in the theta rhythm  
643 (Welker 1964; Youngentob *et al.* 1987; Wesson *et al.* 2008; Kepecs *et al.* 2007). The work  
644 herein is the first to investigate the influence of olfactory selective attention on sniffing  
645 behavior in a rodent. This question is of great interest and importance, since theta

646 oscillations in both olfactory regions and beyond are profoundly shaped by respiration  
647 (Adrian 1942; Macrides 1975; Vanderwolf 1992; Tort *et al.* 2018a; Colgin 2013; Zhang *et*  
648 *al.* 2021; Fontanini and Bower 2006; Kay and Laurent 1999; Buonviso *et al.* 2003; Miura  
649 *et al.* 2012). Especially relevant to our work, low frequency respiration during freezing  
650 behavior can drive strong coherence between OB and mPFC activity, further supporting  
651 functional connectivity between these networks (Moberly *et al.* 2018; Bagur *et al.* 2021).

652         Rodents structure their sniffing in manners influenced by motivation, behavioral  
653 task structure, and the sensory stimulus itself (Wesson *et al.* 2008; Kepecs *et al.* 2007;  
654 Clarke and Trowill 1971; Ikemoto and Panksepp 1994; Rojas-Líbano and Kay 2012;  
655 Lefèvre *et al.* 2016). While some findings suggest that sniffing strategies do not change  
656 in the face of increased perceptual difficulty (Wesson *et al.* 2009; Uchida and Mainen  
657 2003), we hypothesized, based on our finding of increased theta synchrony between the  
658 OB and mPFC (**Fig. 7**), that enhanced attentional demand may influence sampling  
659 strategy. For instance, a rat might increase sniffing frequency during odor sampling when  
660 attention to odors versus attending to tones. We found that rats' sniffing strategies were  
661 remarkably resilient to shifting attentional demands, remaining stereotyped as rats flexibly  
662 switched their attention from the auditory to olfactory modality (**Fig. 8**). This is in contrast  
663 to some findings in humans, indicating that humans alter the timing and depth of their  
664 inhalations during odor anticipation and/or attention (Arabkheradmand *et al.* 2020; Plailly  
665 *et al.* 2006). Interestingly, humans also structure their inhalations relative to task structure  
666 even when the task is not olfactory in nature, pointing to a role for respiration in structuring  
667 and supporting behavioral performance overall (Perl *et al.* 2019). This idea, along with  
668 our findings, together raise the intriguing possibility that rhythmic sniffing may even

669 enhance perception of other stimulus modalities (*e.g.*, auditory), perhaps via cross-modal  
670 entrainment (Bauer *et al.* 2021; Lakatos *et al.* 2019).

671 It is interesting to consider sensory sampling via sniffing as analogous to saccadic  
672 eye movements (Uchida *et al.* 2006), which contribute to rhythmic attentional sampling in  
673 the visual system (Fiebelkorn and Kastner 2019; VanRullen 2016). In the visual system,  
674 attention is regarded as overt when it is accompanied by saccadic eye movements to a  
675 target and covert when the eyes remain fixated on a central point (Posner *et al.* 1980).  
676 The investigation of these different modes of attention and their underlying networks has  
677 spanned decades (Posner 2016). While these two processes engage similar brain  
678 networks (Rizzolatti *et al.* 1987; Corbetta 1998), suggesting that they may not actually be  
679 separate, other work suggests different populations of neurons within these networks may  
680 support each type of attention (Thompson *et al.* 2005). Analogously, our observation of  
681 covert olfactory attention (*i.e.* olfactory attention that occurs in the absence of attention-  
682 specific changes in sniffing behavior; **Fig. 8**) does not necessitate that olfactory attention  
683 is *always* covert (*i.e.* sniffing is unaffected), and perhaps different behavioral contexts  
684 might engage different olfactory attentional frameworks.

685

686 *Conclusion.*

687 Taken together, our data support a model of olfactory attention in which the mPFC  
688 integrates with olfactory regions at early (OB) and later (TuS) stages of odor processing  
689 to form an olfactory attention network. This network encompasses local attention-  
690 dependent changes in activity within the OB and mPFC, as well as strengthening of  
691 interregional coupling between the mPFC-OB and mPFC-TuS. Our data suggest that

692 changes in sniffing do not drive these effects, highlighting that odor-directed attention, at  
693 least in this context, is orchestrated by top-down mechanisms, as opposed to ‘bottom-up’  
694 influences (from odor sampling). Overall, these findings begin to reveal an olfactory  
695 attention network and bring us closer to understanding how the brain affords the ability to  
696 selectively attend to odors.

697 **Materials and Methods**

698 *Animals*

699 Adult, male Long-Evans rats were obtained from Charles River (Wilmington, MA) and  
700 Envigo (Indianapolis, IN) and maintained in the University of Florida vivarium on a 12:12  
701 light:dark cycle, with food and water provided *ad libitum* until water restriction for  
702 behavioral shaping began. All experiments were conducted in accordance with NIH  
703 guidelines and were approved by the University of Florida Institutional Animal Care and  
704 Use Committee.

705

706 *Surgical procedures*

707 For all surgical procedures, rats were maintained on 4-1% isoflurane in 1.5 L/min O<sub>2</sub> and  
708 placed in a stereotaxic frame. The scalp was shaved and cleaned with betadine and 70%  
709 ethanol. Analgesia in the form of meloxicam was administered (5 mg/kg s.c.) and the local  
710 anesthetic marcaine (5 mg/kg s.c.) was given prior to the cranial incision. A cranial incision  
711 was made and the skin was retracted using hemostats.

712 For viral injections, a craniotomy was then drilled over the region of interest, and a  
713 glass micropipette containing AAV was slowly lowered into region of interest. For  
714 anterograde mPFC injections (**Fig. 1**), 100 nL of a 50/50 mixture of Cre-dependent  
715 synaptophysin virus (Ef1 $\alpha$ -DIO-Synaptophysin-mRuby in IL; Ef1 $\alpha$ -FLEX\_Synaptophysin-  
716 GFP in PrL; both generous gifts from Dr. Marc Fuccillo, Univ of Pennsylvania) (Herman  
717 *et al.* 2016) and CaMKII-Cre virus (pENN-AAV9-CaMKII-Cre-SV40; Addgene,  
718 Watertown, MA; 105558-AAV9, titer 1x10<sup>13</sup> vg/mL) was injected into the IL, then the  
719 PrL, at a rate of 2 nL/sec. For retrograde mPFC injections (**Fig. S1**), 200 nL total of AAVrg-

720 hSyn-GFP (Addgene 50465-AAVrg; titer  $7 \times 10^{12}$  vg/mL) was unilaterally injected at a  
721 rate of 2 nL/sec into the mPFC (100 nL in IL, followed by 100 nL in PrL). For TuS  
722 injections, 200 nL of AAVrg-hSyn-GFP (Addgene 50465-AAVrg; titer  $7 \times 10^{12}$  vg/mL) was  
723 injected unilaterally at a rate of 2nL/sec. In all cases, after waiting 5 minutes, the pipette  
724 was slowly withdrawn from the brain, the craniotomy was sealed with dental wax, and the  
725 incision was sutured.

726 For electrode implants, the skull was scrubbed with 3% H<sub>2</sub>O<sub>2</sub> and covered with a  
727 thin layer of cyanoacrylate (Vetbond, 3M). Craniotomies were drilled over each brain area  
728 of interest, plus 3 craniotomies for 0-80 stainless-steel screws to aid in anchoring the  
729 dental cement. After drilling craniotomies over each brain area of interest, the bipolar  
730 stainless-steel electrodes (0.005-in outer diameter, Teflon coated to 0.007-in outer  
731 diameter) were lowered into the brain and secured with a small amount of dental cement  
732 before moving on to the next electrode. Once all wires were placed and secured, an  
733 electrical interface board (EIB) (Open Ephys, Cambridge, MA) fitted with a 32 channel  
734 connector (Omnetics, Minneapolis, MN) was lowered over the skull, and the electrode  
735 wires were secured to the desired channels using gold pins. After the stainless-steel  
736 ground wire was secured to a skull screw with conductive silver paint, the whole assembly  
737 was secured with dental cement.

738 For thermocouple implants (Wesson 2013; Uchida and Mainen 2003), following  
739 skull preparation as above, a craniotomy was made in the nasal bone (0.9 mm lateral  
740 from midline) and a thermocouple wire was lowered 3 mm into the nasal cavity and  
741 secured with dental cement. Then, as for the electrode implants, an EIB with a 32-channel  
742 Omnetics connector was lowered over the skull, the thermocouple leads secured with

743 gold pins, and a ground wire secured to a skull screw before the whole assembly was  
744 secured with dental cement.

745 Following surgery, rats were returned to their home cages to recover on a heating  
746 blanket. The rats received post-operative analgesia for at least 3 days mixed with a  
747 palatable gel (5 mg/kg meloxicam in Medigel, ClearH2O, Westbrook, ME). Electrode  
748 implanted rats were implanted prior to the beginning of behavioral shaping. Thermocouple  
749 implanted rats were shaped prior to surgery and were allowed full water access for at  
750 least 24 hours prior to surgery. All rats were allowed to recover for at least 5 days before  
751 beginning or restarting water restriction.

752

### 753 *Perfusion and histology*

754 For anterograde mPFC viral injections (**Fig. 1**), rats were perfused 2-4 weeks following  
755 injection. For retrograde mPFC (**Fig. S1**), and TuS viral injections (**Fig. 2**), rats were  
756 perfused 2 weeks following injection. All rats were overdosed with Fatal-Plus and  
757 perfused with cold 0.9% NaCl followed by cold 4% formalin. Brains were dissected and  
758 stored in 10% formalin in 30% sucrose prior to sectioning. Alternate 40 um sections were  
759 collected with a sliding microtome and stored in Tris-buffered saline with 0.03% sodium  
760 azide. For electrode implanted rats, sections were mounted on gelatin subbed slides and  
761 stained with 0.1% cresyl violet to confirm electrode locations.

762

### 763 *Image acquisition and quantification*

764 Brain areas of interest were identified using the rat brain atlas (Paxinos and Watson  
765 1997). Images were acquired with a Nikon Eclipse Ti2e fluorescent microscope at 20x

766 magnification using a Nikon 16 MP DS-Qi2 monochrome CMOS camera. For all tracing  
767 experiments, successful targeting of the desired subregion was confirmed, and injections  
768 with spillover into surrounding regions were excluded. For anterograde mPFC injections  
769 (**Fig. 1**), if one of the two injections was on target, we analyzed only that region and  
770 disregarded the other. Overall, we analyzed 8 rats with on target PrL injections and 5 rats  
771 with on target IL injections, with 3 rats having both PrL and IL quantified. From these rats,  
772 images for quantification were acquired as follows: for the TuS, 11 images per rat, evenly  
773 spanning 2.7mm anterior – 0.8 mm posterior Bregma. For the PCX, 17 images per rat  
774 were quantified, evenly spanning 3.7mm anterior – 4.8mm posterior Bregma. For the  
775 AON, 6 images per rat were quantified, evenly spanning 5.7mm-2.7mm anterior Bregma.  
776 For retrograde TuS injections (**Fig. 2**), 3-10 ( $6.46\pm 2.48$ ) PrL/IL-containing sections and 1-  
777 6 ( $3.9\pm 1.46$ ) OFC-containing sections were imaged (n = 6 rats).

778         After acquiring images, ROIs were drawn around each area of interest and  
779 fluorescent puncta or cell bodies were detected using semi-automated counting  
780 algorithms created within NIS elements software (Nikon) based on their fluorescence  
781 intensity and size. Cell or puncta counts were then normalized to the ROI area for  
782 comparison across regions. For layer-specific quantification (**Fig. 2E**), custom MATLAB  
783 code was used to determine the layer in which each counted cell resided. The medial and  
784 lateral TuS were defined as the medial and lateral third of the TuS, to ensure clear  
785 separation between the regions. In puncta quantification, we initially differentiated  
786 between the anterior and posterior PCX, which was divided based on the presence or  
787 absence respectively, of the lateral olfactory tract. Because we observed no differences  
788 in puncta between the anterior and posterior PCX for PrL (paired, two-tailed t-test,  $p=0.32$ )



789 or IL (paired, two-tailed t-test,  $p=0.12$ ), we combined them for the data and analyses  
790 shown in **Fig. 1**.

791

### 792 *Olfactory and auditory stimuli*

793 The odors used for all experiments were isopentyl acetate and limonene(-), obtained at  
794 their highest available purity (Sigma, St. Louis, MO), and diluted in mineral oil (Sigma) to  
795 0.5 Torr so that they possessed equal vapor pressures. Odors were delivered through  
796 independent lines via an air-dilution olfactometer at 2 L/min via a custom 3-D printed  
797 nose-poke port. The auditory stimulus was a 2.5 kHz tone (~70dB) generated with a piezo  
798 speaker (RadioShack, Boston, MA).

799

### 800 *Carlson Attention Task*

801 Rats were water restricted to no less than 15% of their initial body weight and were  
802 shaped on the Carlson Attention Task (CAT) as described in detail previously (Carlson *et*  
803 *al.* 2018). Briefly, rats were first shaped on single-modality 2-alternative choice (2-AC)  
804 tasks in blocks of 20 trials, starting with tone-on/tone-off 2-AC, then odor A/odor B, before  
805 learning the multi-modal attention task. In the final task, rats initiated a trial by nose poking  
806 in a center port. They were required to hold for 1 second (for LFP rats) or 600 ms (for  
807 sniffing rats) before stimulus delivery, and were then required to remain for at least 400  
808 ms for stimulus delivery (the prolonged hold period for the rats contributing LFP data was  
809 implemented to provide a sufficient window for subsequent analyses). After leaving the  
810 center port, the rats had 4 seconds to make a choice at either the left or right port. Correct  
811 choices were rewarded with 15  $\mu$ L of 2 mM saccharin in water, and incorrect choices were

812 unrewarded. If no choices were made in the 4 second window, the trial was recorded as  
813 an omission. After the 4 second window, an additional 1 sec inter-trial interval (ITI) was  
814 implemented which was reset by a nose poke during that second. Thus, across all trials  
815 the rats were out of the center port for one full second prior to their trial-initiating poke.  
816 Sessions began with 3 blocks of odor only, in which there were no competing tone cues.  
817 After completing 3 blocks at  $\geq 80\%$  correct, the rats began receiving simultaneous  
818 olfactory and auditory cues, and were required to complete 6 blocks of tone attention  
819 (attending tones, and ignoring odors) at  $\geq 80\%$  correct. After this, an uncued rule change  
820 occurred, requiring the rats to now attend odors, and ignore tones. After 6 blocks at  $\geq 80\%$   
821 correct on odor attention, the rats completed 3 more blocks of odor only at the end of the  
822 session. Odor only blocks were included at the beginning and end of the session to  
823 neutralize any potential effects of motivation. For all task types, trial combinations were  
824 pseudorandomly presented, such that equal numbers of each trial type were given in each  
825 block of 20 trials.

826 For LFP recordings, this shaping process occurred over the course of 33-46 ( $40.8$   
827  $\pm 2.3$ ) sessions, resulting in expert rats who had switched their attention from tones to  
828 odors 8-11 ( $9.8 \pm 0.6$ ) times prior to the final recorded sessions included in our data  
829 analysis. Each rat contributed 3-6 ( $4.6 \pm 0.5$ ) sessions of expert performance to the  
830 analysis. For sniffing recordings, shaping occurred over 63-72 ( $67.3 \pm 2.4$ ) sessions, rats  
831 switched their attention 11-17 ( $13.6 \pm 1.8$ ) times before recorded sessions, and  
832 contributed 1-6 ( $3.5 \pm 2.5$ ) sessions of expert performance to the analysis. Shaping with  
833 the rats used for sniffing took more sessions for them to reach expert performance since

834 they were delayed in learning/performance due to surgical implantation of thermocouples  
835 mid task acquisition.

836

### 837 *Data acquisition*

838 LFPs from all electrodes were digitized using an RHD 2132 headstage (Intan  
839 Technologies, Los Angeles, CA), amplified using a PZ5 amplifier (Tucker-Davis  
840 Technologies, Alachua, FL), and acquired at 3 kHz using OpenEx and an RZ2 BioAmp  
841 processor (Tucker-Davis Technologies). Tethering of the rats to the PZ5 occurred via a  
842 flexible ultralight tether with a commutator in-line to allow free movement. Entrances to  
843 the left, right, and center ports were detected by infrared beam breaks and acquired at  
844 380 Hz. Behavioral and stimulus delivery events were simultaneously recorded in  
845 OpenEx using the RZ2 BioAmp processor, allowing for synchrony between the behavioral  
846 and neural events. The thermocouple signals were acquired similarly along with behavior,  
847 but using Synapse software with a sampling rate of 610 Hz.

848

### 849 *Local field potential analysis*

850 To minimize potential multisensory influences (Gnaedinger *et al.* 2019), all trials analyzed  
851 were tone-off trials (**Fig. 3B**)(Carlson *et al.* 2018), and came from blocks where behavioral  
852 performance was  $\geq 80\%$  correct. For odor only, tone attention, and odor attention, only  
853 correct trials were included in all analysis (unless otherwise specified; **Fig. 5D**). For switch  
854 blocks, where the rat is by-definition performing poorly and responding to negative reward  
855 feedback, we included correct and incorrect trials. Because only tone-off trials were  
856 analyzed, there were twice as many odor only trials compared to tone attention and odor

857 attention. Therefore, we randomly discarded half of the odor only trials, preserving the  
858 proportion that were from the beginning/end of the session as well as the proportion of  
859 trial types. The data were imported into MATLAB and traces spanning -10 to 8.4 sec from  
860 odor onset from each trial were downsampled to 1 kHz, filtered 0.5-100 Hz using a 2<sup>nd</sup>  
861 order bandpass filter, and 59-61 Hz using a 2<sup>nd</sup> order band-stop filter. These large  
862 segments of data were further filtered to avoid edge artifacts from filtering, but smaller  
863 segments were used for later analysis. Power and coherence were computed using the  
864 Chronux toolbox (Mitra and Bokil 2009)(<http://chronux.org>), and raw values were  
865 normalized to odor only trials, to identify effects specifically related to attentional demand.  
866 Specifically, multi-taper power spectra and coherence were computed using 5 tapers, and  
867 mean power was determined by averaging within the given frequency range. For power  
868 and PAC analyses, a single LFP trace from the bipolar electrode was used. For coherence  
869 analyses, a subtracted trace was first created from the bipolar electrode. For power and  
870 coherence analyses, theta was defined as 2-12 Hz, beta as 15-35 Hz, low gamma as 40-  
871 60 Hz, and high gamma as 60-80 Hz.

872 PAC analysis was completed using MATLAB routines from Tort et al., 2010,  
873 wherein the Hilbert transform method was used to determine the phase of the carrier  
874 oscillation (theta), and separately, the envelope of the high frequency oscillation (beta or  
875 high gamma). The amplitude of the beta/high gamma fast oscillation across 51 bins of the  
876 theta phase was plotted to demonstrate PAC strength (**Fig. 5B**). Theta was defined as  
877 2-10 Hz, beta defined as 15-35 Hz, and high gamma defined as 65-100 Hz. For each trial,  
878 a single OB LFP trace spanning from -3 to +1.5 sec from odor onset was used. A larger  
879 segment of time was used for these analyses because more samples were required to

880 examine coupling with theta frequencies down to 2 Hz. Still, this time segment allows for  
881 the analysis to be contained to an individual trial without any overlap with neighboring  
882 trials.

883

#### 884 *Sniffing analysis*

885 As with the LFP analyses, all analyses on the sniffing data were restricted to trials where  
886 the tone was off. Additionally, only correct trials were examined for odor only, tone  
887 attention, and odor attention blocks, while correct and incorrect trials were examined for  
888 switch blocks. The data were imported to MATLAB and traces spanning -10 to 8.4 sec  
889 from odor onset from each trial were filtered using a 2<sup>nd</sup> order band-pass filter from 0.5-  
890 10 Hz. After extracting trials as described above for the LFP analyses, these filtered traces  
891 were convolved with an 8 Hz Morlet wavelet and peaks detected. Detected peaks were  
892 visually inspected and false positives were manually rejected using a custom MATLAB  
893 GUI. The resultant peaks were used to calculate the instantaneous sniffing frequency  
894 throughout the trial. Then, instantaneous frequencies were averaged within each trial  
895 epoch (i.e. hold, odor), and normalized to odor only.

896

#### 897 *General statistical methods*

898 Semi-automated routines were used to ensure rigorous data extraction and analyses.  
899 Details regarding specific statistical tests can be found in their respective results sections  
900 and/or figure legends. Unless otherwise stated, all values are mean  $\pm$  SEM.

901

902

903 **References**

904 Adrian E. D. (1942) Olfactory reactions in the brain of the hedgehog. *J. Physiol.* **100**,  
905 459–473.

906 Arabkheradmand G., Zhou G., Noto T., Yang Q., Schuele S. U., Parvizi J., Gottfried J.  
907 A., et al. (2020) Anticipation-induced delta phase reset improves human olfactory  
908 perception. *PLoS Biol.* **18**, e3000724.

909 Araujo I. E. de, Rolls E. T., Kringelbach M. L., McGlone F., Phillips N. (2003) Taste-  
910 olfactory convergence, and the representation of the pleasantness of flavour, in the  
911 human brain. *Eur J Neurosci* **18**, 2059–2068.

912 Bagur S., Lefort J. M., Lacroix M. M., Lavilléon G. de, Herry C., Chouvaeff M., Billand  
913 C., Geoffroy H., Benchenane K. (2021) Breathing-driven prefrontal oscillations  
914 regulate maintenance of conditioned-fear evoked freezing independently of  
915 initiation. *Nat. Commun.* **12**, 2605.

916 Barker J. M., Taylor J. R., Chandler L. J. (2014) A unifying model of the role of the  
917 infralimbic cortex in extinction and habits. *Learn. Mem.* **21**, 441–8.

918 Bauer A.-K. R., Ede F. van, Quinn A. J., Nobre A. C. (2021) Rhythmic modulation of  
919 visual perception by continuous rhythmic auditory stimulation. *J. Neurosci.* **41**,  
920 7065–7075.

921 Beshel J., Kopell N., Kay L. M. (2007) Olfactory bulb gamma oscillations are enhanced  
922 with task demands. *J Neurosci* **27**, 8358–8365.

923 Birrell J. M., Brown V. J. (2000) Medial frontal cortex mediates perceptual attentional set  
924 shifting in the rat. *J Neurosci* **20**, 4320–4324.

925 Biskamp J., Bartos M., Sauer J. F. (2017) Organization of prefrontal network activity by

- 926           respiration-related oscillations. *Sci. Rep.* **7**, 45508.
- 927   Borgers C., Epstein S., Kopell N. J. (2005) Background gamma rhythmicity and  
928           attention in cortical local circuits: a computational study. *Proc Natl Acad Sci U S A*  
929           **102**, 7002–7007.
- 930   Bragin A., Jandó G., Nádasdy Z., Hetke J., Wise K., Buzsáki G. (1995) Gamma (40-100  
931           Hz) oscillation in the hippocampus of the behaving rat. *J. Neurosci.* **15**, 47–60.
- 932   Brassai A., Suvanjev R.-G., Bán E.-G., Lakatos M. (2015) Role of synaptic and  
933           nonsynaptic glutamate receptors in ischaemia induced neurotoxicity. *Brain Res.*  
934           *Bull.* **112**, 1–6.
- 935   Bressler S. L., Richter C. G. (2015) Interareal oscillatory synchronization in top-down  
936           neocortical processing. *Curr. Opin. Neurobiol.* **31**, 62–66.
- 937   Buonviso N., Amat C., Litaudon P., Roux S., Royet J. P., Farget V., Sicard G. (2003)  
938           Rhythm sequence through the olfactory bulb layers during the time window of a  
939           respiratory cycle. *Eur J Neurosci* **17**, 1811–1819.
- 940   Buzsaki G. (2006) *Rhythms of the Brain*. Oxford Press.
- 941   Buzsáki G., Wang X.-J. (2012) Mechanisms of Gamma Oscillations. *Annu. Rev.*  
942           *Neurosci.* **35**, 203–225.
- 943   Canolty R. T., Edwards E., Dalal S. S., Soltani M., Nagarajan S. S., Kirsch H. E., Berger  
944           M. S., Barbare N. M., Knight R. T. (2006) High gamma power is phase-locked to  
945           theta oscillations in human neocortex. *Science (80-. )*. **313**, 1626–1628.
- 946   Cardin J. A., Carlen M., Meletis K., Knoblich U., Zhang F., Deisseroth K., Tsai L.-H.,  
947           Moore C. I. (2009) Driving fast-spiking cells induces gamma rhythm and controls  
948           sensory responses. *Nature* **459**, 663–667.

- 949 Carey R. M., Verhagen J. V, Wesson D. W., Pirez N., Wachowiak M. (2009) Temporal  
950 Structure of Receptor Neuron Input to the Olfactory Bulb Imaged in Behaving Rats.  
951 *J Neurophysiol* **101**, 1073–1088.
- 952 Carlson K. S., Dillione M., Wesson D. W. (2014) Odor- and state-dependent olfactory  
953 tubercle local field potential dynamics in awake rats. *J. Neurophysiol.* **111**, 2109–  
954 2123.
- 955 Carlson K. S., Gadziola M. A., Dauster E. S., Wesson D. W. (2018) Selective Attention  
956 Controls Olfactory Decisions and the Neural Encoding of Odors. *Curr. Biol.* **28**,  
957 2195-2205.e4.
- 958 Cenier T., McGann J. P., Tsuno Y., Verhagen J. V, Wachowiak M. (2013) Testing the  
959 Sorption Hypothesis in Olfaction: A Limited Role for Sniff Strength in Shaping  
960 Primary Odor Representations During Behavior. *J. Neurosci.* **33**, 79–92.
- 961 Chaudhury D., Escanilla O., Linster C. (2009) Bulbar acetylcholine enhances neural and  
962 perceptual odor discrimination. *J Neurosci* **29**, 52–60.
- 963 Clarke S., Trowill J. A. (1971) Sniffing and motivated behavior in the rat. *Physiol Behav*  
964 **6**, 49–52.
- 965 Colgin L. L. (2013) Mechanisms and functions of theta rhythms. *Annu. Rev. Neurosci.*  
966 **36**, 295–312.
- 967 Corbetta M. (1998) Frontoparietal cortical networks for directing attention and the eye to  
968 visual locations: Identical, independent, or overlapping neural systems? *Proc. Natl.*  
969 *Acad. Sci. U. S. A.* **95**, 831–838.
- 970 Courtiol E., Wilson D. A. (2016) Neural Representation of Odor-Guided Behavior in the  
971 Rat Olfactory Thalamus. *J. Neurosci.* **36**, 5946–5960.



- 972 D'Souza R. D., Vijayaraghavan S. (2014) Paying attention to smell: Cholinergic  
973 signaling in the olfactory bulb. *Front. Synaptic Neurosci.* **6**.
- 974 Devore S., Linster C. (2012) Noradrenergic and cholinergic modulation of olfactory bulb  
975 sensory processing. *Front. Behav. Neurosci.*
- 976 Devoto P., Flore G., Saba P., Fà M., Gessa G. L. (2005) Stimulation of the locus  
977 coeruleus elicits noradrenaline and dopamine release in the medial prefrontal and  
978 parietal cortex. *J. Neurochem.* **92**, 368–374.
- 979 Ding D. C. D., Gabbott P. L. A., Totterdell S. (2001) Differences in the laminar origin of  
980 projections from the medial prefrontal cortex to the nucleus accumbens shell and  
981 core regions in the rat. *Brain Res.* **917**, 81–89.
- 982 Eeckman F. H., Freeman W. J. (1990) Correlations between unit firing and EEG in the  
983 rat olfactory system. *Brain Res* **528**, 238–244.
- 984 Erö C., Gewaltig M. O., Keller D., Markram H. (2018) A cell atlas for the mouse brain.  
985 *Front. Neuroinform.* **12**.
- 986 Falco E. De, An L., Sun N., Roebuck A., Greba Q., Lapish C., Howland J. (2019) The  
987 Rat Medial Prefrontal Cortex Exhibits Flexible Neural Activity States during the  
988 Performance of an Odor Span Task. *eNeuro* **6**.
- 989 Fiebelkorn I. C., Kastner S. (2019) A rhythmic theory of attention. *Trends Cogn. Sci.* **23**,  
990 87.
- 991 Fontanini A., Bower J. M. (2006) Slow-waves in the olfactory system: an olfactory  
992 perspective on cortical rhythms. *Trends Neurosci.* **29**, 429–437.
- 993 Fries P. (2015) Rhythms for Cognition: Communication through Coherence. *Neuron* **88**,  
994 220–235.

- 995 Fries P., Reynolds J. H., Rorie A. E., Desimone R. (2001) Modulation of oscillatory  
996 neuronal synchronization by selective visual attention. *Science* (80-. ). **291**, 1560–  
997 1563.
- 998 Gabbott P. L. A., Warner T. A., Jays P. R. L., Salway P., Busby S. J. (2005) Prefrontal  
999 cortex in the rat: Projections to subcortical autonomic, motor, and limbic centers. *J.*  
1000 *Comp. Neurol.* **492**, 145–177.
- 1001 Gill T. M., Sarter M., Givens B. (2000) Sustained visual attention performance-  
1002 associated prefrontal neuronal activity: Evidence for cholinergic modulation. *J.*  
1003 *Neurosci.* **20**.
- 1004 Gnaedinger A., Gurden H., Gourévitch B., Martin C. (2019) Multisensory learning  
1005 between odor and sound enhances beta oscillations. *Sci. Rep.* **9**, 11236.
- 1006 Gottfried J. A. (2010) Central mechanisms of odour object perception. *Nat Rev Neurosci*  
1007 **11**, 628–641.
- 1008 Halabisky B., Strowbridge B. W. (2003) Gamma-frequency excitatory input to granule  
1009 cells facilitates dendrodendritic inhibition in the rat olfactory Bulb. *J Neurophysiol*  
1010 **90**, 644–654.
- 1011 Halassa M. M., Kastner S. (2017) Thalamic functions in distributed cognitive control.  
1012 *Nat. Neurosci.* **20**, 1669–1679.
- 1013 Hardung S., Epple R., Jäckel Z., Eriksson D., Uran C., Senn V., Gibor L., Yizhar O.,  
1014 Diester I. (2017) A Functional Gradient in the Rodent Prefrontal Cortex Supports  
1015 Behavioral Inhibition. *Curr. Biol.* **27**.
- 1016 Herman A. M., Ortiz-Guzman J., Kochukov M., Herman I., Quast K. B., Patel J. M.,  
1017 Tepe B., et al. (2016) A cholinergic basal forebrain feeding circuit modulates

- 1018           appetite suppression. *Nature* **538**, 253–256.
- 1019   Himmelheber A. M., Sarter M., Bruno J. P. (2000) Increases in cortical acetylcholine  
1020           release during sustained attention performance in rats. *Cogn. Brain Res.* **9**, 313–  
1021           25.
- 1022   Ikemoto S. (2003) Involvement of the Olfactory Tubercle in Cocaine Reward:  
1023           Intracranial Self-Administration Studies. *J. Neurosci.* **23**, 9305–9311.
- 1024   Ikemoto S., Panksepp J. (1994) The relationship between self-stimulation and sniffing in  
1025           rats: does a common brain system mediate these behaviors? *Behav Brain Res* **61**,  
1026           143–162.
- 1027   Izquierdo A. (2017) Functional Heterogeneity within Rat Orbitofrontal Cortex in Reward  
1028           Learning and Decision Making. *J. Neurosci.* **37**, 10529–10540.
- 1029   Jensen O., Colgin L. L. (2007) Cross-frequency coupling between neuronal oscillations.  
1030           *Trends Cogn. Sci.* **11**, 267–9.
- 1031   Jordan R., Fukunaga I., Kollo M., Schaefer A. T. (2018) Active Sampling State  
1032           Dynamically Enhances Olfactory Bulb Odor Representation. *Neuron*.
- 1033   Kay L., Freeman W. (1998) Bidirectional processing in the olfactory-limbic axis during  
1034           olfactory behavior. *Behav. Neurosci.* **112**, 541–553.
- 1035   Kay L. M. (2003) Two species of gamma oscillations in the olfactory bulb: dependence  
1036           on behavioral state and synaptic interactions. *J Integr Neurosci* **2**, 31–44.
- 1037   Kay L. M., Beshel J., Brea J., Martin C., Rojas-Libano D., Kopell N. (2009) Olfactory  
1038           oscillations: the what, how and what for. *Trends Neurosci.* **32**, 207–214.
- 1039   Kay L. M., Laurent G. (1999) Odor- and context-dependent modulation of mitral cell  
1040           activity in behaving rats. *Nat Neurosci* **2**, 1003–1009.

- 1041 Kay L. M., Sherman S. M. (2006) An argument for an olfactory thalamus. *Trends*  
1042 *Neurosci* **30**, 47–53.
- 1043 Kepecs A., Uchida N., Mainen Z. F. (2007) Rapid and precise control of sniffing during  
1044 olfactory discrimination in rats. *J Neurophysiol* **98**, 205–213.
- 1045 Kim H., Ährlund-Richter S., Wang X., Deisseroth K., Carlén M. (2016) Prefrontal  
1046 Parvalbumin Neurons in Control of Attention. *Cell* **164**, 208–218.
- 1047 Kloet S. F. de, Bruinsma B., Terra H., Heistek T. S., Passchier E. M. J., Berg A. R. van  
1048 den, Luchicchi A., Min R., Pattij T., Mansvelder H. D. (2021) Bi-directional  
1049 regulation of cognitive control by distinct prefrontal cortical output neurons to  
1050 thalamus and striatum. *Nat. Commun.* **12**, 1994.
- 1051 Kopell N., Ermentrout G. B., Whittington M. A., Traub R. D. (2000) Gamma rhythms and  
1052 beta rhythms have different synchronization properties. *Proc. Natl. Acad. Sci. U. S.*  
1053 *A.* **97**, 1867–1872.
- 1054 Lakatos P., Gross J., Thut G. (2019) A New Unifying Account of the Roles of Neuronal  
1055 Entrainment. *Curr. Biol.* **29**, R890–R905.
- 1056 Lakatos P., Karmos G., Mehta A. D., Ulbert I., Schroeder C. E. (2008) Entrainment of  
1057 Neuronal Oscillations as a Mechanism of Attentional Selection. *Science (80- )*.  
1058 **320**, 110–113.
- 1059 Laubach M., Amarante L. M., Swanson T. K., White S. R. (2018) What, if anything, is  
1060 rodent prefrontal cortex? *eneuro*, ENEURO.0315-18.2018.
- 1061 Lefèvre L., Courtiol E., Garcia S., Thévenet M., Messaoudi B., Buonviso N. (2016)  
1062 Significance of sniffing pattern during the acquisition of an olfactory discrimination  
1063 task. *Behav. Brain Res.* **312**, 341–54.

- 1064 Lepousez G., Lledo P.-M. (2013) Odor Discrimination Requires Proper Olfactory Fast  
1065 Oscillations in Awake Mice. *Neuron* **80**, 1010–24.
- 1066 Ljubojevic V., Luu P., Gill P. R., Beckett L.-A., Takehara-Nishiuchi K., Rosa E. De  
1067 (2018) Cholinergic Modulation of Frontoparietal Cortical Network Dynamics  
1068 Supporting Supramodal Attention. *J. Neurosci.* **38**, 3988–4005.
- 1069 Losacco J., Ramirez-Gordillo D., Gilmer J., Restrepo D. (2020a) Learning improves  
1070 decoding of odor identity with phase-referenced oscillations in the olfactory bulb.  
1071 *Elife* **9**, e52583.
- 1072 Losacco J., Ramirez-Gordillo D., Gilmer J., Restrepo D. (2020b) Learning improves  
1073 decoding of odor identity with phase-referenced oscillations in the olfactory bulb.  
1074 *Elife* **9**.
- 1075 Luchicchi A., Mnie-Filali O., Terra H., Bruinsma B., Kloet S. F. de, Obermayer J.,  
1076 Heistek T. S., et al. (2016) Sustained Attentional States Require Distinct Temporal  
1077 Involvement of the Dorsal and Ventral Medial Prefrontal Cortex. *Front. Neural*  
1078 *Circuits* **10**, 70.
- 1079 Mably A. J., Colgin L. L. (2018) Gamma oscillations in cognitive disorders. *Curr. Opin.*  
1080 *Neurobiol.* **52**, 182–187.
- 1081 Macrides F. (1975) Temporal relationships between hippocampal slow waves and  
1082 exploratory sniffing in hamsters. *Behav Biol* **14**, 295–308.
- 1083 Macrides F., Eichenbaum H. B., Forbes W. B. (1982) Temporal relationship between  
1084 sniffing and the limbic theta rhythm during odor discrimination reversal learning. *J*  
1085 *Neurosci* **2**, 1705–1711.
- 1086 Marquis J.-P., Killcross S., Haddon J. E. (2007) Inactivation of the prelimbic, but not

- 1087           infralimbic, prefrontal cortex impairs the contextual control of response conflict in  
1088           rats. *Eur. J. Neurosci.* **25**, 559–566.
- 1089   Martin C., Ravel N. (2014) Beta and gamma oscillatory activities associated with  
1090           olfactory memory tasks: Different rhythms for different functional networks? *Front.*  
1091           *Behav. Neurosci.* **8**.
- 1092   McAlonan K., Cavanaugh J., Wurtz R. H. (2008) Guarding the gateway to cortex with  
1093           attention in visual thalamus. *Nature* **456**, 391–394.
- 1094   McCormick D. A., Feese H. R. (1990) Functional implications of burst firing and single  
1095           spike activity in lateral geniculate relay neurons. *Neuroscience* **39**, 103–113.
- 1096   McLean J. H., Shipley M. T., Nickell W. T., Aston-Jones G., Reyher C. K. (1989)  
1097           Chemoanatomical organization of the noradrenergic input from locus coeruleus to  
1098           the olfactory bulb of the adult rat. *J Comp Neurol* **285**, 339–349.
- 1099   Merre P. Le, Ährlund-Richter S., Carlén M. (2021) The mouse prefrontal cortex: Unity in  
1100           diversity. *Neuron* **109**, 1925–1944.
- 1101   Miller E. K., Cohen J. D. (2001) An Integrative Theory of Prefrontal Cortex Function.  
1102           *Annu. Rev. Neurosci.* **24**, 167–202.
- 1103   Mitra P., Bokil H. (2009) *Observed Brain Dynamics*.
- 1104   Miura K., Mainen Z. F., Uchida N. (2012) Odor Representations in Olfactory Cortex:  
1105           Distributed Rate Coding and Decorrelated Population Activity. *Neuron* **74**, 1087–  
1106           1098.
- 1107   Moberly A. H., Schreck M., Bhattarai J. P., Zweifel L. S., Luo W., Ma M. (2018)  
1108           Olfactory inputs modulate respiration-related rhythmic activity in the prefrontal  
1109           cortex and freezing behavior. *Nat. Commun.* **9**, 1528.

- 1110 Murata K., Kanno M., Ieki N., Mori K., Yamaguchi M. (2015) Mapping of Learned Odor-  
1111 Induced Motivated Behaviors in the Mouse Olfactory Tubercle. *J. Neurosci.* **35**,  
1112 10581–10599.
- 1113 Nakayama H., Ibañez-Tallon I., Heintz N. (2018) Cell-Type-Specific Contributions of  
1114 Medial Prefrontal Neurons to Flexible Behaviors. *J. Neurosci.* **38**, 4490 LP – 4504.
- 1115 Neville K. R., Haberly L. B. (2003) Beta and gamma oscillations in the olfactory system  
1116 of the urethane-anesthetized rat. *J Neurophysiol* **90**, 3921–3930.
- 1117 O'Connor D., Fukui M., Pinsk M., Kastner S. (2002) Attention modulates responses in  
1118 the human lateral geniculate nucleus. *Nat. Neurosci.* **5**, 1203–1209.
- 1119 Ogg M. C., Ross J. M., Bendahmane M., Fletcher M. L. (2018) Olfactory bulb  
1120 acetylcholine release dishabituates odor responses and reinstates odor  
1121 investigation. *Nat. Commun.* **9**, 1868.
- 1122 Osinski B. L., Kim A., Xiao W., Mehta N. M., Kay L. M. (2018) Pharmacological  
1123 manipulation of the olfactory bulb modulates beta oscillations: Testing model  
1124 predictions. *J. Neurophysiol.* **120**.
- 1125 Passetti F., Dalley J. W., O'connell M. T., Everitt B. J., Robbins T. W. (2000) Increased  
1126 acetylcholine release in the rat medial prefrontal cortex during performance of a  
1127 visual attentional task. *Eur. J. Neurosci.* **12**.
- 1128 Paxinos G., Watson C. (1997) *The Rat Brain in Stereotaxic Coordinates*. Academic  
1129 Press.
- 1130 Perl O., Ravia A., Rubinson M., Eisen A., Soroka T., Mor N., Secundo L., Sobel N.  
1131 (2019) Human non-olfactory cognition phase-locked with inhalation. *Nat. Hum.*  
1132 *Behav.* 2019 **35** **3**, 501–512.

- 1133 Plailly J., d'Amato T., Saoud M., Royet J. P. (2006) Left temporo-limbic and orbital  
1134 dysfunction in schizophrenia during odor familiarity and hedonicity judgments.  
1135 *Neuroimage* **29**, 302–313.
- 1136 Plailly J., Howard J. D., Gitelman D. R., Gottfried J. A. (2008) Attention to odor  
1137 modulates thalamocortical connectivity in the human brain. *J Neurosci* **28**, 5257–  
1138 5267.
- 1139 Posner M. I. (2016) ORIENTING OF ATTENTION: THEN AND NOW. *Q. J. Exp.*  
1140 *Psychol. (Hove)*. **69**, 1864.
- 1141 Posner M. I., Snyder C. R., Davidson B. J. (1980) Attention and the detection of signals.  
1142 *J. Exp. Psychol. Gen.* **109**.
- 1143 Ragozzino M. E., Kim J., Hassert D., Minniti N., Kiang C. (2003) The contribution of the  
1144 rat prelimbic-infralimbic areas to different forms of task switching. *Behav. Neurosci.*
- 1145 Richter C. G., Thompson W. H., Bosman C. A., Fries P. (2017) Top-down beta  
1146 enhances bottom-up gamma. *J. Neurosci.* **37**.
- 1147 Rikhye R. V., Gilra A., Halassa M. M. (2018) Thalamic regulation of switching between  
1148 cortical representations enables cognitive flexibility. *Nat. Neurosci.* **21**.
- 1149 Rizzolatti G., Riggio L., Dascola I., Umiltá C. (1987) Reorienting attention across the  
1150 horizontal and vertical meridians: Evidence in favor of a premotor theory of  
1151 attention. *Neuropsychologia* **25**.
- 1152 Rodgers C. C., DeWeese M. R. (2014) Neural Correlates of Task Switching in  
1153 Prefrontal Cortex and Primary Auditory Cortex in a Novel Stimulus Selection Task  
1154 for Rodents. *Neuron* **82**, 1157–1170.
- 1155 Rojas-Líbano D., Kay L. M. (2012) Interplay between Sniffing and Odorant Sorptive



- 1156 Properties in the Rat. *J. Neurosci.* **32**, 15577–15589.
- 1157 Rolls E. T. (2004) The functions of the orbitofrontal cortex. *Brain Cogn* **55**, 11–29.
- 1158 Rothermel M., Carey R. M., Puche A., Shipley M. T., Wachowiak M. (2014) Cholinergic  
1159 Inputs from Basal Forebrain Add an Excitatory Bias to Odor Coding in the Olfactory  
1160 Bulb. *J. Neurosci.* **34**, 4654–4664.
- 1161 Sacchet M. D., LaPlante R. A., Wan Q., Pritchett D. L., Lee A. K. C., Hämäläinen M.,  
1162 Moore C. I., Kerr C. E., Jones S. R. (2015) Attention drives synchronization of  
1163 alpha and beta rhythms between right inferior frontal and primary sensory  
1164 neocortex. *J. Neurosci.* **35**.
- 1165 Samuelsen C. L., Gardner M. P. H., Fontanini A. (2013) Thalamic Contribution to  
1166 Cortical Processing of Taste and Expectation. *J. Neurosci.* **33**, 1815–1827.
- 1167 Santana N., Artigas F. (2017) Laminar and Cellular Distribution of Monoamine  
1168 Receptors in Rat Medial Prefrontal Cortex. *Front. Neuroanat.* **11**, 87.
- 1169 Sara S. J. (2009) *The locus coeruleus and noradrenergic modulation of cognition.*
- 1170 Schmitt L. I., Wimmer R. D., Nakajima M., Happ M., Mofakham S., Halassa M. M.  
1171 (2017) Thalamic amplification of cortical connectivity sustains attentional control.  
1172 *Nature* **545**, 219–223.
- 1173 Schoenbaum G., Roesch M. R., Stalnaker T. A., Takahashi Y. K. (2009) A new  
1174 perspective on the role of the orbitofrontal cortex in adaptive behaviour. *Nat Rev*  
1175 *Neurosci* **10**, 885–892.
- 1176 Schoppa N. E. (2006) Synchronization of olfactory bulb mitral cells by precisely timed  
1177 inhibitory inputs. *Neuron* **49**, 271–283.
- 1178 Schroeder C. E., Lakatos P. (2009a) The Gamma Oscillation: Master or Slave? *Brain*

- 1179 *Topogr.* **22**, 24–26.
- 1180 Schroeder C. E., Lakatos P. (2009b) Low-frequency neuronal oscillations as  
1181 instruments of sensory selection. *Trends Neurosci.* **32**, 9–18.
- 1182 Shusterman R., Smear M. C., Koulakov A. A., Rinberg D. (2011) Precise olfactory  
1183 responses tile the sniff cycle. *Nat Neurosci* **14**, 1039–1044.
- 1184 Siegle J. H., Pritchett D. L., Moore C. I. (2014) Gamma-range synchronization of fast-  
1185 spiking interneurons can enhance detection of tactile stimuli. *Nat. Neurosci.* **17**.
- 1186 Small D. M., Zatorre R. J., Dagher A., Evans A. C., Jones-Gotman M. (2001) Changes  
1187 in brain activity related to eating chocolate: From pleasure to aversion. *Brain* **124**,  
1188 1720–1733.
- 1189 Sobel E. C., Tank D. W. (1993) Timing of odor stimulation does not alter patterning of  
1190 olfactory bulb unit activity in freely breathing rats. *J Neurophysiol* **69**, 1331–1337.
- 1191 Spellman T., Svei M., Kaminsky J., Manzano-Nieves G., Liston C. (2021) Prefrontal  
1192 deep projection neurons enable cognitive flexibility via persistent feedback  
1193 monitoring. *Cell* **184**, 2750-2766.e17.
- 1194 Spence C., Kettenmann B., Kobal G., McGlone F. P. (2000) Selective attention to the  
1195 chemosensory modality. *Percept. Psychophys.* **62**, 1265–1271.
- 1196 Spitzer B., Haegens S. (2017) Beyond the Status Quo: A Role for Beta Oscillations in  
1197 Endogenous Content (Re)Activation. *eneuro* **4**, ENEURO.0170-17.2017.
- 1198 Spors H., Wachowiak M., Cohen L. B., Friedrich R. W. (2006) Temporal dynamics and  
1199 latency patterns of receptor neuron input to the olfactory bulb. *J Neurosci* **26**, 1247–  
1200 1259.
- 1201 Thompson K. G., Biscoe K. L., Sato T. R. (2005) Neuronal basis of covert spatial

- 1202 attention in the frontal eye field. *J. Neurosci.* **25**.
- 1203 Tort A. B. L., Brankač J., Draguhn A. (2018a) Respiration-Entrained Brain Rhythms  
1204 Are Global but Often Overlooked. *Trends Neurosci.*
- 1205 Tort A. B. L., Ponsel S., Jessberger J., Yanovsky Y., Brankač J., Draguhn A. (2018b)  
1206 Parallel detection of theta and respiration-coupled oscillations throughout the  
1207 mouse brain. *Sci. Rep.* **8**.
- 1208 Tort A., Komorowski R., Eichenbaum H., Kopell N. (2010) Measuring phase-amplitude  
1209 coupling between neuronal oscillations of different frequencies. *J. Neurophysiol.*  
1210 **104**, 1195–1210.
- 1211 Uchida N., Kepecs A., Mainen Z. F. (2006) Seeing at a glance, smelling in a whiff: rapid  
1212 forms of perceptual decision making. *Nat Rev Neurosci* **7**, 485–491.
- 1213 Uchida N., Mainen Z. F. (2003) Speed and accuracy of olfactory discrimination in the  
1214 rat. *Nat Neurosci* **6**, 1224–1229.
- 1215 Vanderwolf C. H. (1992) Hippocampal activity, olfaction, and sniffing: an olfactory input  
1216 to the dentate gyrus. *Brain Res.* **593**, 197–208.
- 1217 VanRullen R. (2016) Perceptual Cycles. *Trends Cogn. Sci.* **20**, 723–735.
- 1218 Verhagen J. V, Wesson D. W., Netoff T. I., White J. A., Wachowiak M. (2007) Sniffing  
1219 controls an adaptive filter of sensory input to the olfactory bulb. *Nat Neurosci* **10**,  
1220 631–639.
- 1221 Vertes R. P. (2004) Differential projections of the infralimbic and prelimbic cortex in the  
1222 rat. *Synapse* **51**, 32–58.
- 1223 Vinck M., Womelsdorf T., Buffalo E. A., Desimone R., Fries P. (2013) Attentional  
1224 Modulation of Cell-Class-Specific Gamma-Band Synchronization in Awake Monkey

- 1225           Area V4. *Neuron* **80**, 1077–1089.
- 1226   Wang P., Boboila C., Chin M., Higashi-Howard A., Shamash P., Wu Z., Stein N., Abbott  
1227           L., Axel R. (2020) Transient and Persistent Representations of Odor Value in  
1228           Prefrontal Cortex. *Neuron* **108**, 209-224.e6.
- 1229   Wang X. J. (2010) *Neurophysiological and computational principles of cortical rhythms*  
1230           *in cognition*.
- 1231   Welker W. I. (1964) Analysis of sniffing in the albino rat. *Behavior* **22**, 223–244.
- 1232   Wesson D. W. (2013) Sniffing Behavior Communicates Social Hierarchy. *Curr. Biol.* **23**,  
1233           575–580.
- 1234   Wesson D. W. (2020) The Tubular Striatum. *J. Neurosci.* **40**, 7379–7386.
- 1235   Wesson D. W., Donahou T. N., Johnson M. O., Wachowiak M. (2008) Sniffing behavior  
1236           of mice during performance in odor-guided tasks. *Chem Senses* **33**, 581–596.
- 1237   Wesson D. W., Verhagen J. V, Wachowiak M. (2009) Why Sniff Fast? The Relationship  
1238           Between Sniff Frequency, Odor Discrimination, and Receptor Neuron Activation in  
1239           the Rat. *J Neurophysiol* **101**, 1089–1102.
- 1240   Wimmer R. D., Schmitt L. I., Davidson T. J., Nakajima M., Deisseroth K., Halassa M. M.  
1241           (2015) Thalamic control of sensory selection in divided attention. *Nature* **526**, 705–  
1242           709.
- 1243   Youngentob S. L., Mozell M. M., Sheehe P. R., Hornung D. E. (1987) A quantitative  
1244           analysis of sniffing strategies in rats performing odor discrimination tasks. *Physiol*  
1245           *Behav* **41**, 59–69.
- 1246   Yu A. J., Dayan P. (2005) Uncertainty, Neuromodulation, and Attention. *Neuron* **46**,  
1247           681–692.

- 1248 Zaborszky L., Carlsen J., Brashear H. R., Heimer L. (1986) Cholinergic and GABAergic  
1249 afferents to the olfactory bulb in the rat with special emphasis on the projection  
1250 neurons in the nucleus of the horizontal limb of the diagonal band. *J Comp Neurol*  
1251 **243**, 488–509.
- 1252 Zelano C., Bensafi M., Porter J., Mainland J., Johnson B., Bremner E., Telles C., Khan  
1253 R., Sobel N. (2005) Attentional modulation in human primary olfactory cortex. *Nat*  
1254 *Neurosci* **8**, 114–120.
- 1255 Zhang Z., Collins D. C., Maier J. X. (2021) Network Dynamics in the Developing Piriform  
1256 Cortex of Unanesthetized Rats. *Cereb. Cortex* **31**.
- 1257 Zhang Z., Liu Q., Wen P., Zhang J., Rao X., Zhou Z., Zhang H., et al. (2017) Activation  
1258 of the dopaminergic pathway from VTA to the medial olfactory tubercle generates  
1259 odor-preference and reward. *Elife* **6**, e25423.
- 1260 Zhong W., Ciatipis M., Wolfenstetter T., Jessberger J., Müller C., Ponsel S., Yanovsky  
1261 Y., Brankač J., Tort A. B. L., Draguhn A. (2017) Selective entrainment of gamma  
1262 subbands by different slow network oscillations. *Proc. Natl. Acad. Sci. U. S. A.* **114**.
- 1263
- 1264

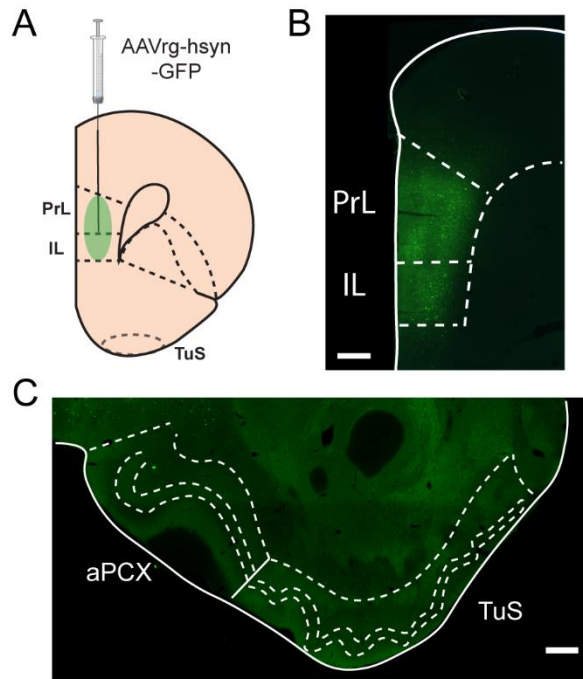

1265  
1266 **Supplemental Figure S1. PCX and TuS projection neurons do not innervate the mPFC. A.**  
1267 The PrL and IL were injected with AAVrg-hsyn-GFP to identify possible mPFC-projecting neurons.  
1268 **B.** Example injection site showing spread through the PrL and IL cortex. Scale bar 250  $\mu$ m. **C.**  
1269 Example image showing lack of labeled cells in the TuS and aPCX, indicating that these structures  
1270 do not project to the mPFC. Similar results were seen in 2 rats. Scale bar 250  $\mu$ m.

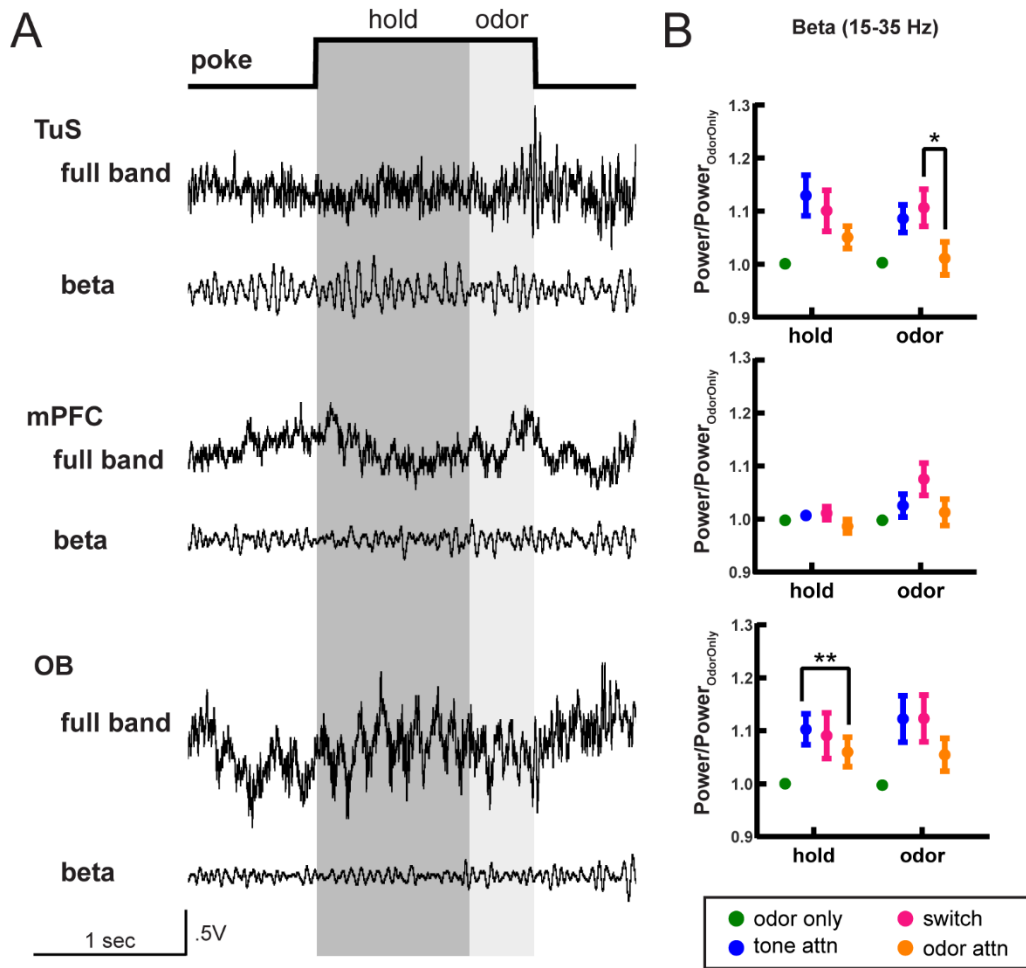

1271  
1272  
1273  
1274  
1275  
1276  
1277  
1278  
1279  
1280  
1281  
1282

**Supplemental Figure S2. Beta oscillation power during attentional states.** **A.** Full band and beta band filtered (15-35 Hz) traces from the TuS (top), mPFC (middle) and OB (bottom) on a single trial of the Carlson Attention task. Analysis windows for hold and odor periods are indicated in dark and light gray, respectively. **B.** Quantification of power in the beta range across all task types, normalized to odor only. Statistical tests were 2-way ANOVA with Geisser-Greenhouse correction. TuS: main effect of task type,  $F(1.94,7.77)=16.37$ ,  $p=0.0017$ . mPFC: main effect of task type,  $F(2.00,8.02)=4.923$ ,  $p=0.0402$ . OB: main effect of task type,  $F(1.49,5.97)=16.52$ ,  $p=0.0047$ . On all graphs, asterisks indicate results from Tukey's multiple comparisons,  $*p<0.05$ ,  $**p<0.01$ . All error bars represent SEM.  $n=5$  rats,  $4.6 \pm 0.5$  sessions per rat.

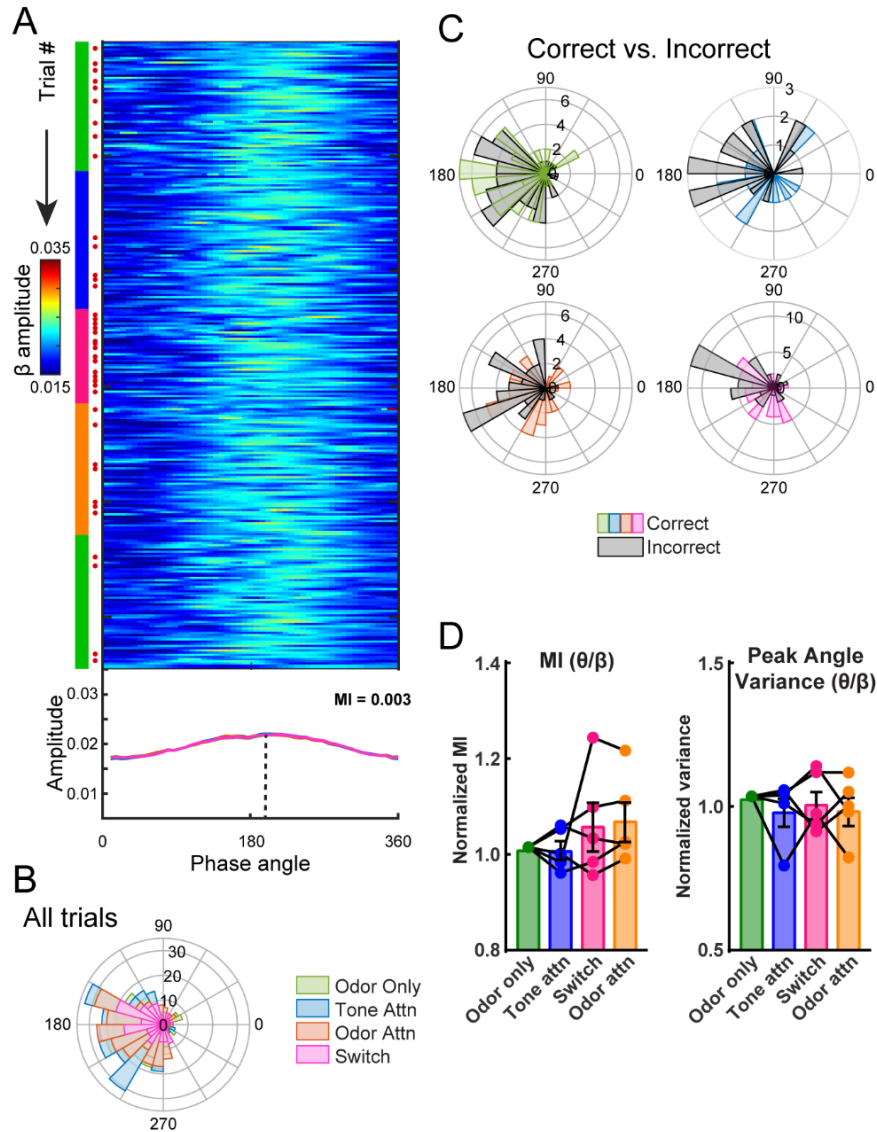

1283  
 1284 **Supplemental Figure S3. Modest theta-beta phase amplitude coupling in the CAT.** **A.** Trial  
 1285 by trial theta-beta PAC for one example session. Green, blue, pink, and orange markings on the  
 1286 left side indicate current task type (odor only, tone attention, switch, and odor attention,  
 1287 respectively). Red dots indicate incorrect trials. The mean amplitude for the session, by task type,  
 1288 is plotted below. MI for the entire session = 0.003. **B.** Polar histogram of peak phase angles  
 1289 by task type for all sessions for this example rat (n=5 sessions). All trial types showed significant  
 1290 periodicity (Rayleigh test, odor only  $p < 1e-27$ , tone attn  $p < 1e-8$ , switch  $p < 0.05$ , odor attn  $p < 1e-12$ )  
 1291 and similar distributions (Kolmogorov-Smirnov tests,  $p > 0.05$  for all comparisons except odor only  
 1292 vs. switch,  $p = 0.046$ ). **C.** Polar histograms showing correct and incorrect trials for each type. For  
 1293 this example rat, incorrect trials were pooled across sessions and compared to a randomly  
 1294 selected equal number of correct trials (n=5 sessions). Peak phase angle distributions were  
 1295 statistically similar between correct and incorrect trials for odor only, odor attention, and switch  
 1296 trials (Kolmogorov-Smirnov tests,  $p > 0.05$ ) but statistically different for tone attention ( $p = 0.041$ ).  
 1297 **D.** Left, theta-beta MI across rats, normalized to MI for odor only trials (One-way ANOVA,  
 1298  $F(1.19, 4.78) = 1.22$ ,  $p = 0.34$ ). Right, theta-beta peak angle variance across rats, normalized to peak  
 1299 angle variance for odor only trials (One-way ANOVA,  $F(2.18, 8.31) = 0.35$ ,  $p = 0.72$ ). n=5 rats, 4.6  
 1300 +/- 0.5 sessions per rat.
